# Supplementary material
Source: PubMed Central journal article supplement (PMC5708850)
Supplement: NIHMS921571-supplement-Supplement1.pdf [file NIHMS921571-supplement-Supplement1.pdf]

## Supplementary Appendix

This appendix has been provided by the authors to give readers additional information about their work.

Supplement to: Bress AP, Bellows BK, King JB, et al. Cost-effectiveness of intensive versus standard blood-pressure control. *N Engl J Med* 2017;377:745-55. DOI: 10.1056/NEJMsa1616035

(PDF updated August 25, 2017)

# **Cost-Effectiveness of Intensive Versus Standard Blood Pressure Control**

## **SUPPLEMENTARY APPENDIX**

### **TABLE OF CONTENTS**

#### **Investigator List (page 3)**

#### **Supplementary Methods (pages 4-12)**

- Hypothetical cohort
- Microsimulation model
- Systolic blood pressure (SBP) changes
- Intervention costs
- Chronic healthcare costs
- Acute event costs
- Utilities
- Probabilistic analyses
- Persistence of treatment effect, medication adherence, and other alternate scenario analyses
- Medication adherence measured directly in SPRINT

#### **Supplementary Figures (pages 13-25)**

- Figure S1: Example of a conventional model structure for clinical events within a given cycle
- Figure S2: Three examples to show the flexible, continuous time approach used in our model structure
- Figure S3: Comparison of the cumulative incidence of the SPRINT primary outcome and all-cause mortality observed in SPRINT to the base-case scenario of the simulation model
- Figure S4: Comparison of the cumulative incidence of the simulation model primary outcome (excluding heart failure) to the Framingham Heart Study cohorts
- Figure S5: Comparison of cumulative incidence of the SPRINT primary outcome across different post-trial adherence and treatment effect scenarios
- Figure S6: Comparison of cumulative incidence of cardiovascular disease death across different post-trial adherence and treatment effect scenarios
- Figure S7: All-cause mortality survival curves, stratified by baseline age category, from the base-case analysis
- Figure S8. Cumulative incremental direct medical costs by type with intensive (Panel A) and standard SBP (Panel B) treatment over time
- Figure S9: Results of the probabilistic analyses as shown on a cost-effectiveness scatter plot
- Figure S10: Comparison of the incremental cost-effectiveness ratio over time between the four post-trial adherence and treatment effect scenarios
- Figure S11: Results of the non-probabilistic one-way sensitivity analyses
- Figure S12: Results of the non-probabilistic threshold analysis of serious adverse events in the post-trial period (Scenario 20)
- Figure S13: Results of the non-probabilistic threshold analysis of intensive vs. standard treatment serious adverse event hazard ratio (Scenario 21)

## **Supplementary Tables (pages 26-68)**

- Table S1. Model input values, ranges, and distributions
- Table S2: Key assumptions regarding risk of clinical events in the four post-trial period adherence and treatment effect scenarios
- Table S3: Key assumptions regarding alternate antihypertensive medication adherence scenarios
- Table S4: Diagnosis and procedure codes used to identify event costs
- Table S5: Assumptions for alternate scenario analyses not related to medication adherence
- Table S6: Comparison of simulation outputs to published SPRINT results at median SPRINT follow up of 3.3 years
- Table S7: Lifetime simulated cardiovascular disease events across the four different post-trial period adherence and treatment effect scenarios
- Table S8: Direct medical costs (2017 US\$), reported by type, from probabilistic analyses
- Table S9: Direct medical costs, effectiveness, and incremental cost-effectiveness results of probabilistic analyses in subgroups
- Table S10. Non-probabilistic analyses of costs, effectiveness, and incremental cost-effectiveness results in scenario analyses
- Table S11: Adherence to CHEERS CEA checklist
- Table S12: Reporting checklist for cost-effectiveness analyses from the Second Panel on Cost-effectiveness in Health and Medicine

## **Supplementary References (pages 69-71)**

## Investigator List

Adam P. Bress\*, PharmD, MS,<sup>1</sup> Brandon K. Bellows\*, PharmD, MS,<sup>2,3</sup> Jordan King, PharmD, MS,<sup>4</sup> Rachel Hess, MD, MS,<sup>1,5</sup> Srinivasan Beddhu, MD,<sup>6</sup> Zugui Zhang, PhD,<sup>7</sup> Dan R. Berlowitz, MD,<sup>8</sup> Molly B. Conroy, MD, MPH,<sup>9</sup> Larry Fine, MD,<sup>10</sup> Suzanne Oparil, MD,<sup>11</sup> Donald E. Morisky, ScD,<sup>12</sup> Lewis E. Kazis, ScD,<sup>13</sup> Natalia Ruiz-Negrón, PharmD,<sup>2,3</sup> Jamie Powell, MD,<sup>14</sup> Leonardo Tamariz, MD, MPH,<sup>15</sup> Jeff Whittle, MD, MPH,<sup>16,17</sup> Jackson Wright, MD, PhD,<sup>18</sup> Mark A. Supiano, MD,<sup>19</sup> Alfred K. Cheung, MD,<sup>6</sup> William S. Weintraub<sup>#</sup>, MD,<sup>7</sup> and Andrew E. Moran<sup>#</sup>, MD, MPH<sup>20</sup>; for the SPRINT Research Group and the SPRINT Economics and Health Related Quality of Life Subcommittee

1. Department of Population Health Sciences, University of Utah, Salt Lake City, UT
2. Department of Pharmacotherapy, University of Utah, Salt Lake City, UT
3. SelectHealth, Murray, UT
4. Pharmacy Department, Kaiser Permanente Colorado, Aurora, CO
5. Division of General Internal Medicine, Department of Internal Medicine, University of Utah, Salt Lake City, UT
6. Division of Nephrology and Hypertension, Department of Internal Medicine, University of Utah, Salt Lake City, UT
7. Christiana Care Health System, Newark, DE
8. Center for Healthcare Organization and Implementation Research, Bedford VA Medical Centers; Health Policy and Management Department, Boston University School of Public Health.
9. Department of Medicine, University of Pittsburgh School of Medicine, Pittsburgh, PA
10. Clinical Applications and Prevention Branch, Division of Cardiovascular Sciences, National Heart, Lung, and Blood Institute, Bethesda, Maryland
11. Vascular Biology and Hypertension Program, Division of Cardiovascular Disease, University of Alabama at Birmingham, Birmingham, AL
12. Fielding School of Public Health, Department of Community Health Sciences, University of California, Los Angeles, CA
13. Department of Health Law, Policy and Management, Center for the Assessment of Pharmaceutical Practices, Boston University School of Public Health, Boston, Massachusetts.
14. Division of General Internal Medicine, Brody School of Medicine, East Carolina University, Greenville, NC
15. Division of Population Health and Computational Medicine, University of Miami and Geriatric Research, Education and Clinical Center, Miami VA
16. Clement J Zablocki VA Medical Center, Milwaukee, WI
17. Department of Medicine, Medical College of Wisconsin, Wauwatosa, WI
18. Division of Nephrology and Hypertension, University Hospitals Case Medical Center, Case Western Reserve University, Cleveland, OH
19. Division of Geriatrics, Department of Internal Medicine, University of Utah, and VA Salt Lake City Geriatric Research, Education and Clinical Center, Salt Lake City, UT
20. Division of General Medicine, Department of Medicine, Columbia University Medical Center, New York, NY

\* Contributed equally as first authors

<sup>#</sup> Contributed equally as senior authors

Corresponding author: Adam Bress, PharmD, MS  
University of Utah  
30 South, 2000 East  
Salt Lake City, Utah 84112-5820  
Phone: (801)587-9119  
Fax: (801) 587-8923  
[adam.bress@hsc.utah.edu](mailto:adam.bress@hsc.utah.edu)

## SUPPLEMENTARY METHODS

### *Hypothetical Cohort*

As specified in the analysis plan, the model was populated with a hypothetical cohort of 10,000 patients based on the characteristics of the population included in Systolic Blood Pressure Intervention Trial (SPRINT).<sup>1</sup> The rationale, design, and main results of SPRINT have been published elsewhere.<sup>1-3</sup> Briefly, The SPRINT eligibility criteria were: age  $\geq 50$  years; systolic blood pressure (SBP) of 130-180 mmHg on 0 or 1 antihypertensive medication class, 130-170 mmHg on up to 2 classes, 130-160 mmHg on up to 3 classes, 130-150 mmHg on up to 4 classes; and the presence of one or more high cardiovascular disease (CVD) risk conditions. High CVD risk conditions included history of clinical or subclinical cardiovascular disease other than stroke, estimated glomerular filtration rate (eGFR) of 20-59 ml/min/1.73m<sup>2</sup>, 10-year risk for CVD  $\geq 15\%$  calculated using the Framingham risk score for general clinical practice, and age  $\geq 75$  years.<sup>1,3</sup> Participants were not eligible for SPRINT if they had any of the following: diabetes, a history of stroke, more than 1 gram/day of proteinuria, heart failure, were on dialysis, or had an eGFR  $< 20$  ml/min/1.73m<sup>2</sup>. Detailed inclusion and exclusion criteria are listed in the SPRINT protocol.<sup>2</sup>

### *Microsimulation model*

Patients in the simulation cycled uni-directionally through three different health states: 1) no CVD event, 2) post-CVD event, and 3) death. The post-CVD event state included each type of CVD event as well as the possibility of any combination of multiple CVD events. Within each health state, patients were at risk for three possible clinical events, 1) non-fatal or fatal CVD event, 2) non-fatal or fatal serious adverse event (SAE), or 3)

non-CVD death. Analyses were performed using TreeAge Pro 2016 (TreeAge Software, Inc, Williamstown, MA) and R (R version 3.1.0, Vienna, Austria).

Injurious falls were excluded as an SAE because no difference was found between the intensive and standard groups in SPRINT (intensive 7.1% vs. standard 7.1%,  $p=0.97$ ).<sup>1</sup>

Rather than using a typical Markov model approach to time and model structure (i.e., discrete time intervals) with a half-cycle correction (Figure S1), the model was developed with a continuous time approach for assessing costs and outcomes. In this approach, three random draws from uniform time distributions, which corresponded to the order and timing of the three main events of interest (i.e., non-CVD mortality, SAEs, and CVD events), were performed every cycle in the model (Figure S2). Within each health state, the structure of the model contains six pathways, with each pathway containing a unique order of the main events of interest. This allowed for varying the time at which a patient became at risk for having each of the three events within a cycle and, in contrast to a traditional model structure, accounted for competing risks (Figure S2). Each cycle, the model ranked the value of each of the random time draws from smallest to largest. Then, the patient was assigned to the appropriate pathway corresponding to that order of risk.

The cumulative costs and benefits experienced in the model were calculated upon exiting the current cycle (i.e., either at 6 months if surviving all events or upon death). Costs, quality-adjusted life-years (QALYs), and life-years were calculated using

transition costs and benefits, and were based on the exact time of the fatal or non-fatal events. Chronic costs were truncated to discrete times as appropriate (e.g., prescription drug costs were incurred at monthly intervals because patients do not usually fill less than one month at a time). To calculate costs, QALYs, and life-years achieved, the survival time (person-years) was multiplied by the health state specific utility values.

A step-by-step explanation of the model process for a theoretical patient example is described below:

1. In the first 6-month cycle of the model, the following random values are drawn from the uniform time distributions: 0.25 for non-CVD death, 0.50 for CVD event, and 0.75 for SAE.
  - a. The patient is first at risk of experiencing non-CVD death 25% of the way through the 6-month cycle (i.e., at 1.5 months).
  - b. The patient survives and then becomes at risk of experiencing a CVD event 50% of the way through the 6-month cycle (i.e., at 3 months [1.5 months after the at risk for non-CVD death]).
  - c. The patient survives and then becomes at risk of experiencing an SAE 75% of the way through the 6-month cycle (i.e., at 4.5 months [1.5 months after the at risk for a CVD event]).
  - d. The patient survives and then exits the cycle at 6 months. Cumulative costs (i.e., treatment specific costs, chronic disease state costs, and acute event costs), QALYs, and life-years experienced are calculated at the time of exit by multiplying the percentage of time alive during current cycle by the appropriate values (e.g., 100% or  $1.00 \times 6$  months = 0.5 life-years).

2. For the second 6-month cycle in the model, the following uniform distributions are drawn: 0.40 non-CVD death, 0.25 CVD event, and 0.65 SAE.
  - a. The patient is first at risk of experiencing a CVD event 25% of the way through the 6-month cycle (i.e., 1.5 months).
  - b. The patient experiences a fatal CVD-event and exits the cycle. The QALYs and life-years experienced are calculated by multiplying the percentage of time alive during current cycle (25% or  $0.25 \times 6$  months = 1.5 months or 0.125 life-years). Chronic costs are calculated based on 2 months of costs (1.5 rounded up to nearest month). Acute costs are based on the type of CVD-event experienced (i.e., myocardial infarction, acute coronary syndrome not resulting in myocardial infarction, stroke, or heart failure).
  - c. The patient survived in the model for a total of 7.5 months or 0.625 life-years (cycle 1, 6 months \* 1.0; cycle 2, 6 months \* 0.25), and experienced 8 months of chronic healthcare costs and the costs associated with 1 acute hospitalization event.

Using this approach, the costs and QALYs were incurred for only the time spent in each state. Had the theoretical patient in the example experienced a non-fatal rather than a fatal CVD event, the time of the event would have represented the precise moment in the model when the patient would begin to experience chronic post-CVD event costs and utility associated with being in a post-CVD event state.

*Systolic blood pressure (SBP) changes*



Along with other patient characteristics, SBP was used to extrapolate outcomes from SPRINT over a lifetime. Two SBP values were randomly assigned to each patient at the start of the model: (1) baseline SBP which was derived from the distribution of baseline SBP values in the entire trial population and (2) treatment SBP which was derived from the distributions of the SBP for each arm at the end of SPRINT follow-up. It was assumed that treatment effect on SBP persisted throughout the first five years in all patients without an SAE, and continued beyond five years as long as the patient remained adherent to therapy. In addition, after the initial five year period, all patients began to experience age-related increases in SBP, which was derived from the Framingham Heart Study, regardless of adherence to treatment.<sup>4</sup>

In patients who experienced an SAE, regardless of whether it occurred before or after the initial 5 years, it was assumed that they stopped taking one antihypertensive medication and experienced an increase in SBP of 9.1 mmHg, which is equivalent to the mean SBP reduction with one standard dose antihypertensive.<sup>5</sup> If the SAE occurred during the first five years in the model, patients began to experience age-related increases in SBP at the time of the SAE.

It was assumed that all patients were adherent to their assigned treatment as observed in SPRINT during the first five years. However, if a patient became non-adherent to therapy after the initial five-year period, SBP was assumed to return to baseline SBP values and continued to experience age-related increases. The probability of being adherent to treatment was stratified by the number of anti-HTN medications a patient was receiving as derived from the literature.<sup>6-8</sup>

In addition to changes in medication due to SAEs, antihypertensive medication therapy changes occurred for increases in SBP. For every 10 mmHg increase in SBP above the SPRINT follow up treatment SBP, patients received one additional antihypertensive medication, up to a maximum of five medications.

### *Intervention costs*

In the base-case, patients had four office visits per year in the intensive arm (two with lab monitoring) and three (one with lab monitoring) in the standard arm.<sup>9-11</sup> The cost of office visits and lab monitoring are described in Table S1, and were derived using CPT/HCPCS codes (Table S4) and estimates from the Centers for Medicare and Medicaid Services (CMS) Physician and Laboratory Fee Schedules.<sup>12,13</sup>

### *Chronic healthcare costs*

Chronic non-CVD healthcare costs were stratified by age and sex and were applied during every cycle to account for the increased cost of survival with intensive SBP treatment.<sup>10</sup> All chronic costs attributable to CVD events were stratified by age and derived from the CDC Chronic Disease Cost Calculator.<sup>14,15</sup> No additional long-term costs were assigned to patients associated with the development of chronic kidney disease (CKD). However, if patients with CKD developed end-stage renal disease, then their chronic non-CVD costs were specific to ESRD as derived from published literature<sup>16</sup>

### *Acute event costs*

CVD events and SAEs were assumed to require an inpatient stay, the costs of which were derived using ICD-9 codes (Table S4) and estimates from the Agency for Healthcare Research and Quality's Healthcare Cost and Utilization Project (HCUP).<sup>17</sup> Based on the clinical judgment and prior knowledge, it was assumed that SAEs would resolve within two weeks. The exception was acute kidney injury (AKI), which was assumed to resolve in the same time period as CVD events (i.e., 4 weeks).

To better understand the contributors to cost over time accrued over each cycle, we captured the individual components that made up total costs. These included treatment (i.e., antihypertensive medication costs, office visits, and laboratory monitoring), CVD events, SAEs, chronic CVD, and background direct medical costs.

### *Utilities*

When patients had more than one chronic condition, rather than combining utilities, the condition with the lowest utility (most severe disability) was used.<sup>18</sup> Additionally, a one-time disutility of 0.1 was applied for CVD events and SAEs until the acute event resolved (i.e., 4 weeks for CVD events and AKI, 2 weeks for other SAEs).<sup>10,19,20</sup> For individuals entering the model with clinical CVD, we assigned the baseline utility of chronic MI. Main analyses relied on utility values estimated using the EuroQol five dimensions questionnaire (EQ-5D) in the U.S. Medical Expenditure Panel Survey.<sup>21</sup> Utility values were also directly measured in SPRINT using the EQ-5D.<sup>22</sup> The EQ-5D

was administered in SPRINT at the baseline visit and at the 12-month , 24-month, 36-month, and 48-month follow-up visits.<sup>3</sup> We used these values for in alternate Scenario 14 in Tables S5 and S10.

### *Probabilistic analyses*

Probabilistic analyses examined joint uncertainty of parameter estimates in the model by running 1,000 simulations, each taking random draws from the pre-specified uncertainty distributions of all input parameters. Costs used a gamma distribution, estimates based on proportions (e.g., probability of SAEs, probability of CVD events) used beta distributions, and utility values used beta distributions. As the model was run using microsimulation, the probabilistic analyses consisted of 1,000 and 5,000 iterations, that each contained 10,000 simulated patients individually run through the model. We used these results to determine uncertainty intervals around cost and effectiveness estimates using the 2.5 and 97.5 percentiles. We used willingness-to-pay (WTP) thresholds between \$50,000 and \$150,000/QALY to determine the probability of intensive SBP treatment being cost-effectiveness from the probabilistic analyses.<sup>23</sup> While WTP thresholds of \$50,000-\$100,000/QALY are commonly accepted in the US, some have argued for thresholds of \$150,000/QALY or higher.<sup>24,25</sup> Thus, we explored a range of WTP values from \$50,000-\$150,000/QALY.

### *Persistence of treatment effect, medication adherence, and other alternate scenario analyses*

Several key assumptions were required in order to extrapolate short-term clinical trial results beyond the trial period, and we performed alternate scenario analyses to test these assumptions (Table S2, S3, and S5). We also performed subgroup analyses using probabilistic analyses and the summary treatment effects for the subgroups reported in SPRINT.<sup>1</sup> Subgroups examined, included baseline age above or below 75 years, sex, baseline CKD, black or non-black race, and baseline CVD history. For subgroup analyses, the computer simulation model assembled a full sample of 10,000 patients who met the subgroup definition.

#### *Medication Adherence Measured Directly in SPRINT*

It was assumed that all patients were adherent to their assigned treatment as observed in SPRINT during the first five years. Medication adherence was measured in SPRINT using the 8-item Morisky Medication Adherence Scale (MMAS-8) which is an eight question self-reported instrument that has proven to be a valid and reliable assessment tool for assessing antihypertensive medication adherence.<sup>26,27</sup> The MMAS-8 was administered in SPRINT at the baseline visit and at the 12-month and 48-month follow-up visits.<sup>3</sup> The MMAS-8 is a self-reported questionnaire intended to measure medication adherence by providing information about behavioral and psychological factors that may act as barriers to medication adherence. The MMAS-8 is scored as an ordinal measure with scores ranging from 0 to 8. It is categorized with a score of <6 indicating “low adherence,” 6 to <8 “medium adherence,” and 8 “high adherence” based on previously published definitions.<sup>26-28</sup> We used these values for Scenario 10 in Tables S5 and S10.



**Figure S2: Three examples to show the flexible, continuous time approach used in our model structure**

A) Order of risk: non-CVD death, CVD event, SAE

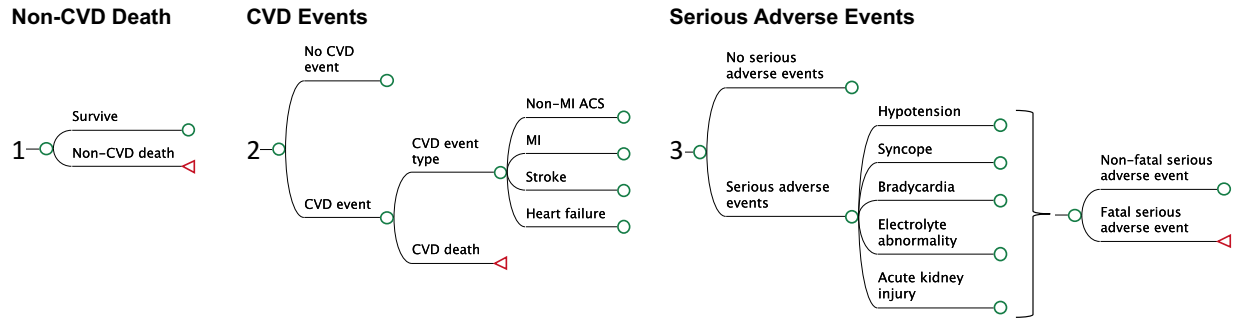

B) Order of risk: CVD event, non-CVD death, SAE

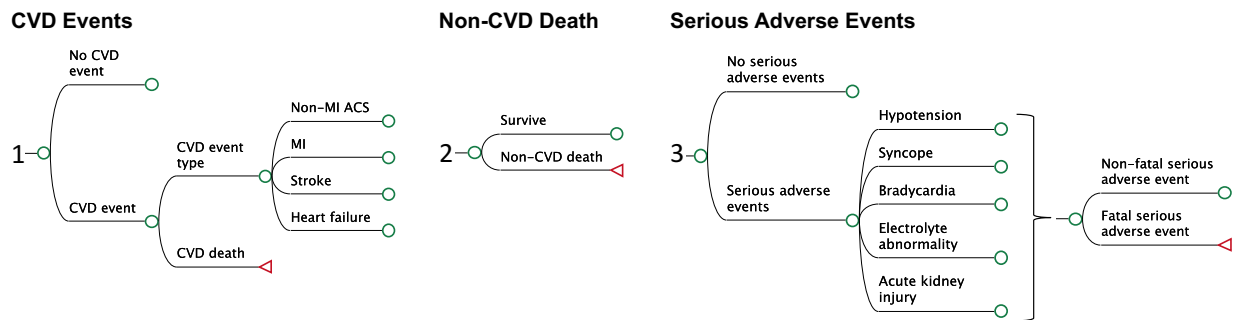

C) Order of risk: CVD event, SAE, non-CVD death

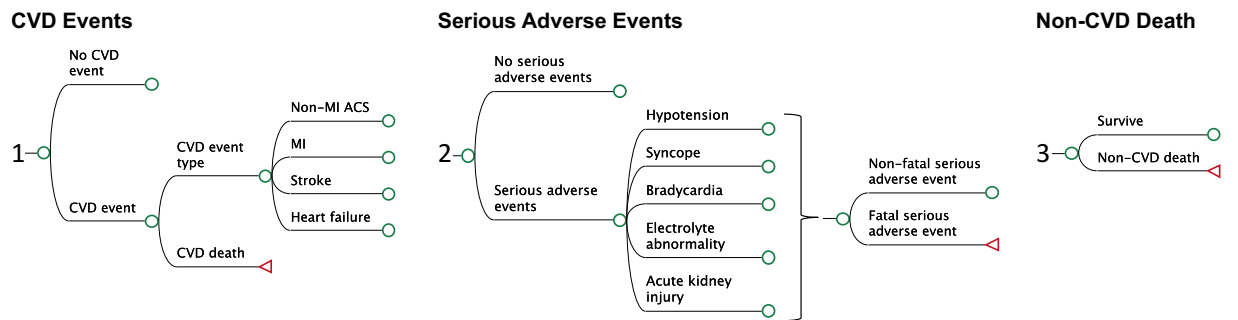

This figure shows three of the six potential pathways a patient could experience within a given cycle. With this approach, patients were randomly assigned the potential time at which they were at risk of experiencing events and thus order of the model structure. In contrast to Figure S1, by using this flexible approach, patients could potentially experience both an SAE and a non-CVD death in the same cycle. Additionally, the events of interest could occur at any time during the cycle (continuous time as opposed to discrete time). A detailed narrative description of these hypothetical event sequences is provided on pages 6 and 7 of the Supplementary Methods.

CVD – Cardiovascular disease, SAE – Serious adverse event

**Figure S3: Comparison of the cumulative incidence of the SPRINT primary outcome and all-cause mortality observed in SPRINT to the base-case scenario of the simulation model**

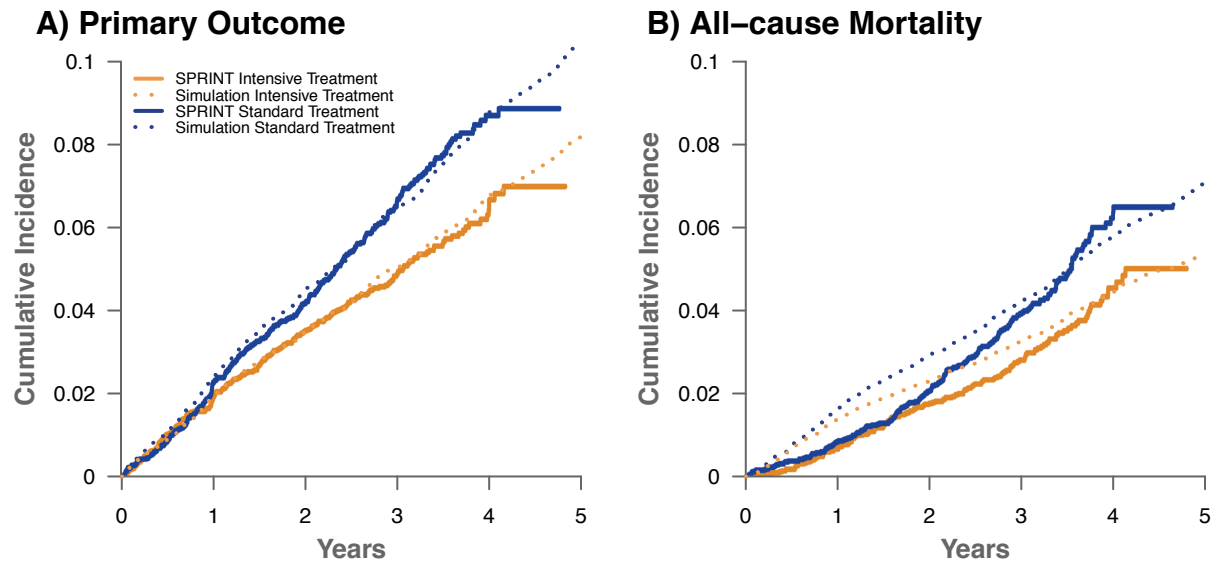

The SPRINT primary composite outcome was myocardial infarction, other acute coronary syndromes, stroke, heart failure, or death from cardiovascular causes.

SPRINT – Systolic Blood Pressure Intervention Trial



**Figure S4: Comparison of the cumulative incidence of the simulation model primary outcome (excluding heart failure) to the Framingham Heart Study cohorts**

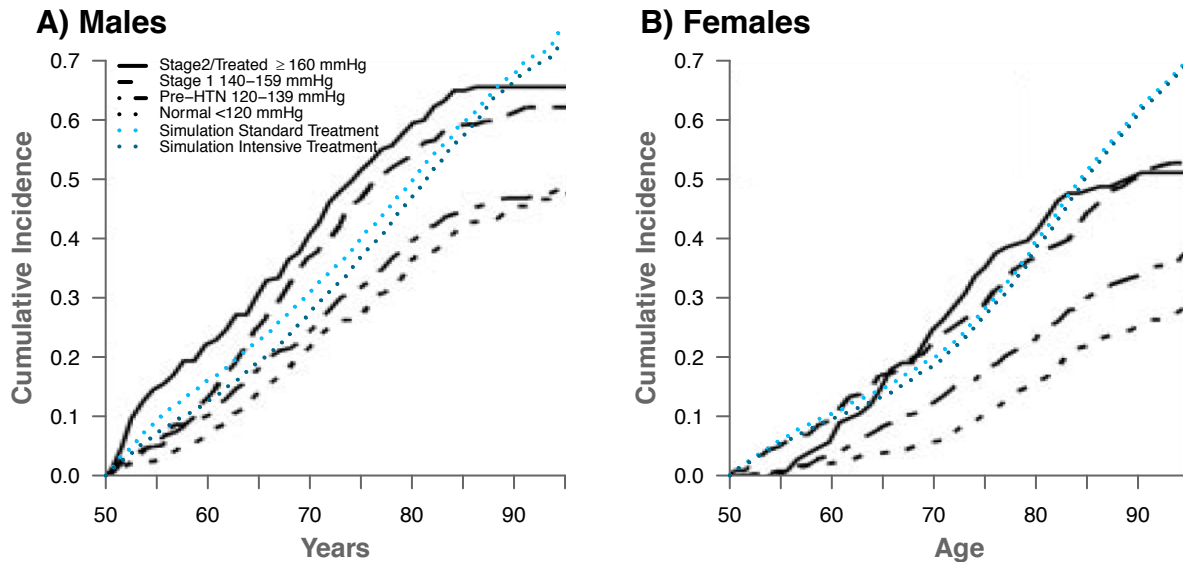

This figure shows the cumulative incidence of the SPRINT primary outcome (excluding heart failure) from the microsimulation model and cumulative incidence of CVD events adjusted for the competing risk of death for men and women according to individual risk factor strata at 50 years of age from Lloyd-Jones et al. using data from the Framingham Heart Study cohorts.<sup>29</sup> The simulation model used the base-case assumptions and was populated with the characteristics of the Framingham Heart Study participants. In Lloyd-Jones et al., atherosclerotic CVD events were defined by the occurrence of myocardial infarction, coronary insufficiency, death resulting from coronary heart disease, angina pectoris, atherothrombotic stroke, intermittent claudication, or other cardiovascular death.<sup>29</sup> Thus, the model primary outcome was based on the SPRINT outcomes, but was modified to exclude heart failure for better comparison to the Framingham Heart Study cohorts.

Original figures reproduced with permission from Lloyd-Jones DM, Leip EP, Larson MG, et al. Prediction of lifetime risk for cardiovascular disease by risk factor burden at 50 years of age. *Circulation* 2006;113:791-8.

HTN – Hypertension.

**Figure S5: Comparison of cumulative incidence of the SPRINT primary outcome across different post-trial adherence and treatment effect scenarios**

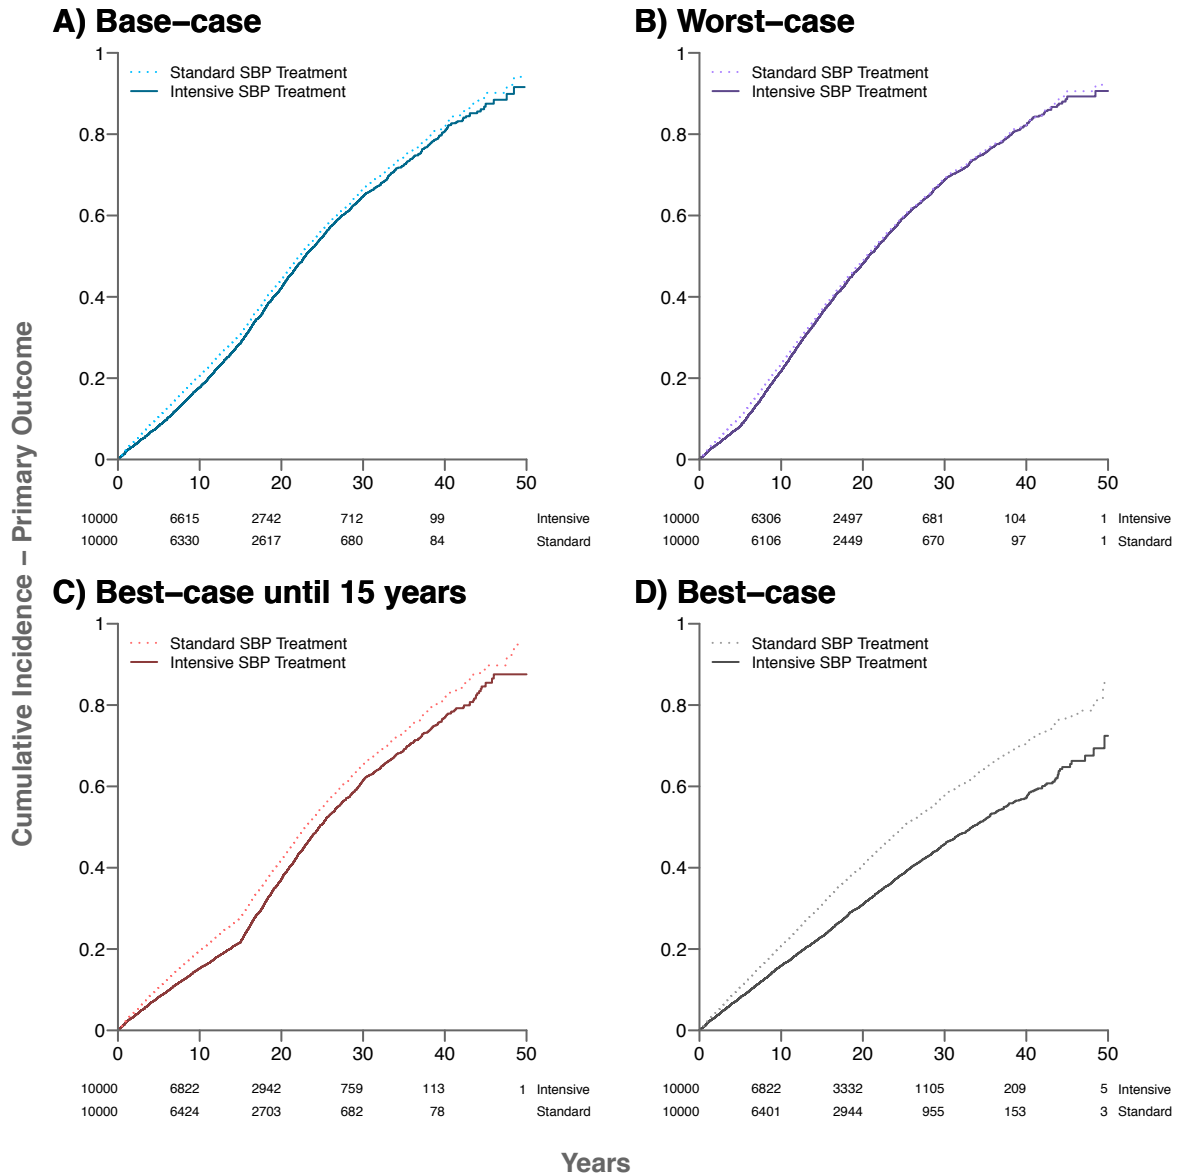

Figures show the cumulative incidence of the first SPRINT primary outcome over time during the simulation. The four different post-trial adherence scenarios are shown: Panel A is the base-case scenario, Panel B is the worst-case scenario, Panel C is best-case until 15 years scenario, and Panel D is the best-case scenario. The y-axis represents the cumulative incidence of the primary outcome and the x-axis represents the time since randomization. The text below the x-axis indicates the number of patients still at risk at that time. The SPRINT primary composite outcome was the first occurrence of myocardial infarction, acute coronary syndrome, stroke, heart failure, or death from cardiovascular causes.

SBP – Systolic blood pressure, SPRINT – Systolic Blood Pressure Intervention Trial

**Figure S6: Comparison of cumulative incidence of cardiovascular disease death across different post-trial adherence and treatment effect scenarios**

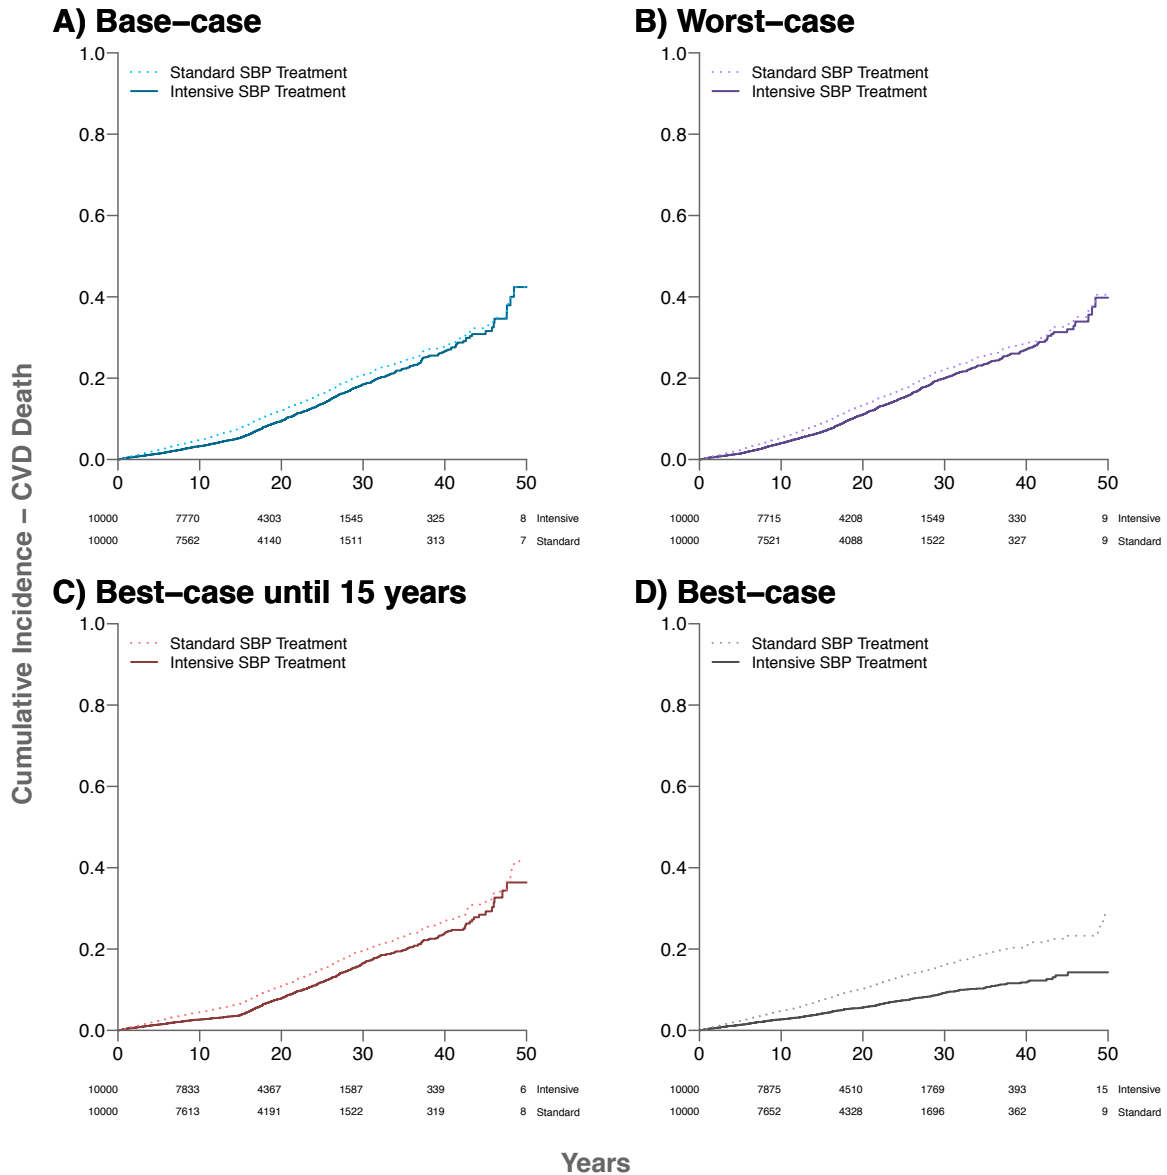

Figures show the cumulative incidence of CVD death over time during the simulation. The four different post-trial adherence scenarios are shown: Panel A is the base-case scenario, Panel B is the worst-case scenario, Panel C is best-case until 15 years scenario, and Panel D is the best-case scenario. The y-axis represents the cumulative incidence of CVD death and the x-axis represents the time since randomization. The text below the x-axis indicates the number of patients still at risk at that time.

CVD – Cardiovascular disease, SBP – Systolic blood pressure

**Figure S7: All-cause mortality survival curves, stratified by baseline age category, from the base-case analysis**

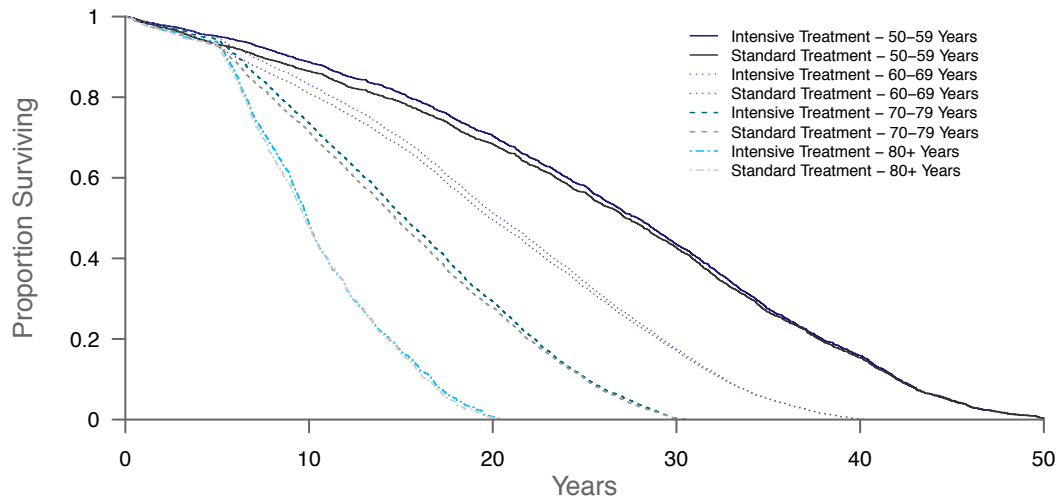

|                            |      |      |      |     |     |   |             |
|----------------------------|------|------|------|-----|-----|---|-------------|
| <b>Intensive Treatment</b> | 2023 | 1795 | 1425 | 879 | 322 | 8 | 50-59 Years |
|                            | 3756 | 3122 | 1929 | 657 | 3   |   | 60-69 Years |
|                            | 3208 | 2360 | 942  | 9   |     |   | 70-79 Years |
|                            | 1013 | 493  | 7    |     |     |   | 80+ Years   |
| <b>Standard Treatment</b>  | 2023 | 1749 | 1383 | 862 | 311 | 7 | 50-59 Years |
|                            | 3756 | 3040 | 1860 | 641 | 2   |   | 60-69 Years |
|                            | 3208 | 2288 | 892  | 8   |     |   | 70-79 Years |
|                            | 1013 | 485  | 5    |     |     |   | 80+ Years   |

Figure shows the overall survival during the simulation for the base-case scenario (i.e., post-trial decay in adherence and treatment effects) stratified by baseline age. The text below the x-axis indicates the number of patients still at risk at that time for each treatment arm by baseline age category.

**Figure S8. Cumulative incremental direct medical costs by type with intensive (Panel A) and standard SBP (Panel B) treatment over time**

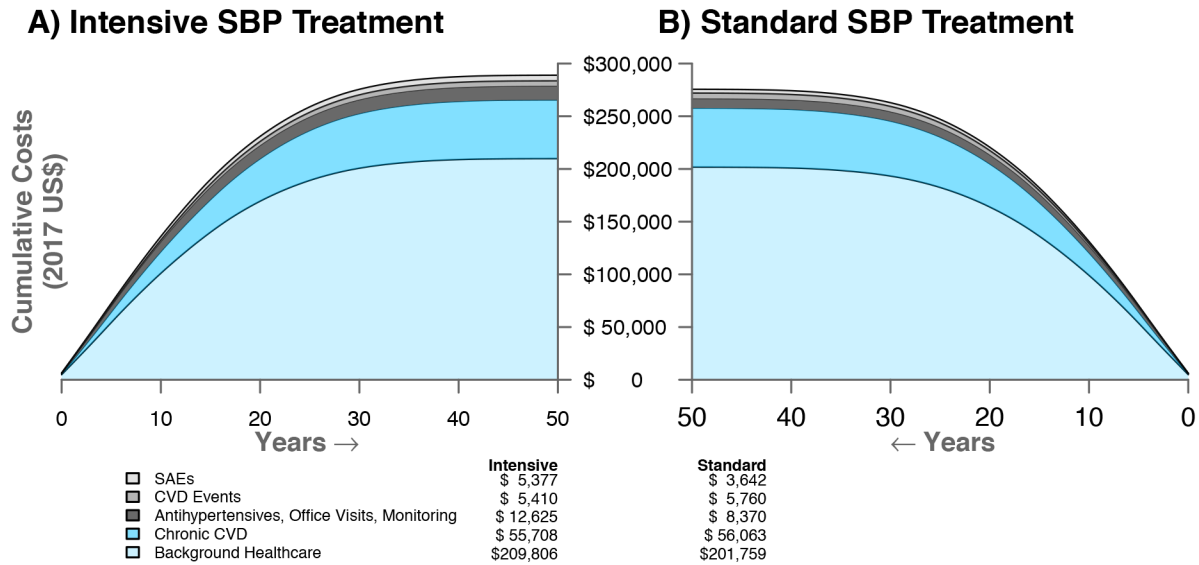

CVD – Cardiovascular disease, SAEs – Serious adverse events, SBP – Systolic blood pressure

**Figure S9: Results of the probabilistic analyses as shown on a cost-effectiveness scatter plot**

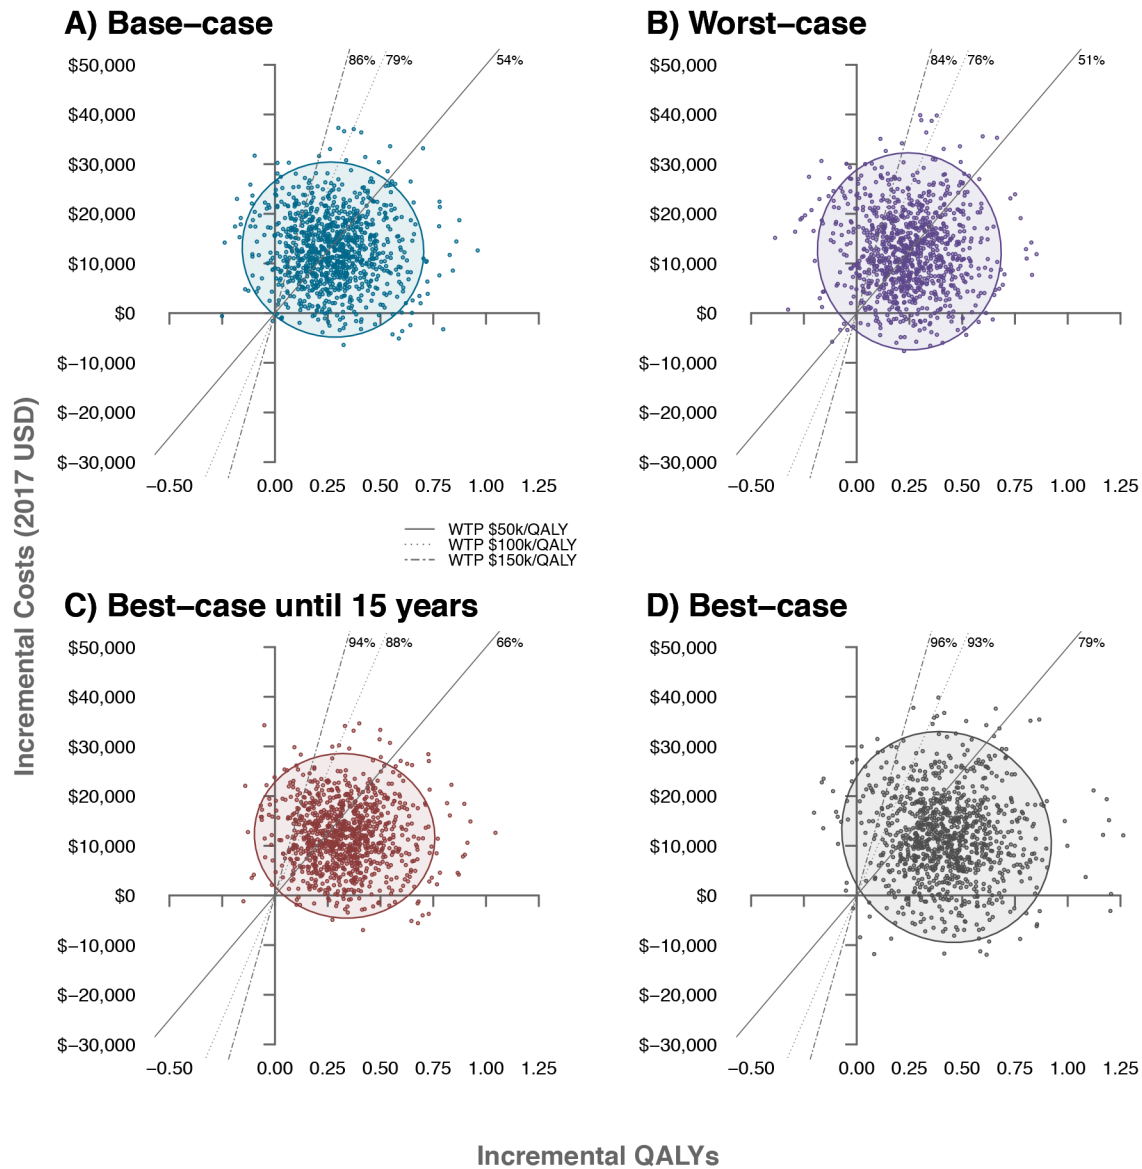

The figure shows the cost-effectiveness scatterplot for each of the four post-trial period treatment effects and adherence scenarios. The x-axis is the mean difference in cumulative QALYs between the intensive and standard treatments. The y-axis is the mean difference in cumulative costs between intensive and standard treatments. The three WTP lines drawn on each plot show the \$50,000, \$100,000, and \$150,000/QALY WTP thresholds. The percentages shown next to each line are the proportion of simulations resulting in intensive treatment being cost-effective at that WTP threshold (proportion of iterations below the line). The colored oval shows the 95% uncertainty interval for the joint distribution of incremental costs and QALYs.

USD – United States dollars, QALY – quality-adjusted life-year, WTP – Willingness-to-pay.

**Figure S10: Comparison of the incremental cost-effectiveness ratio over time between the four post-trial adherence and treatment effect scenarios**

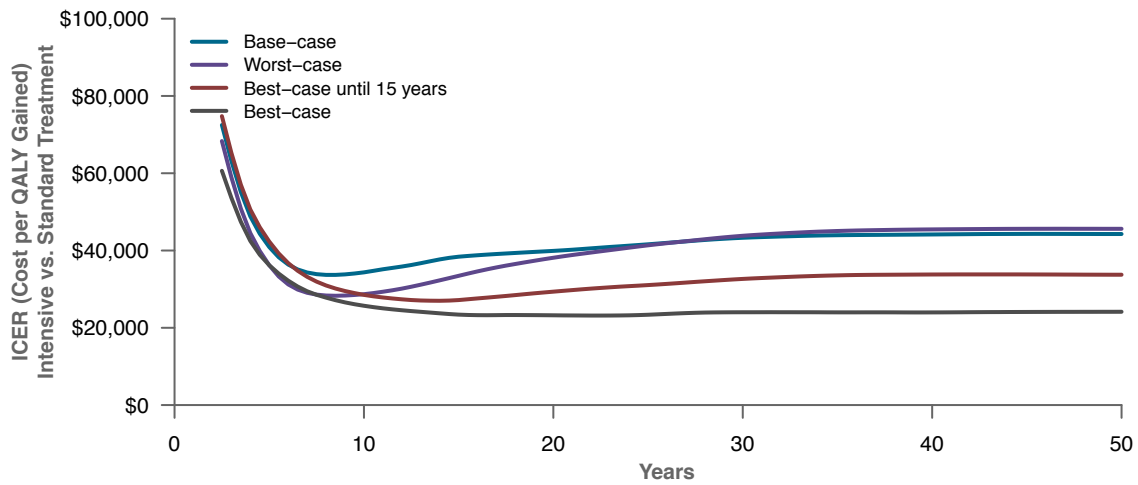

The figure shows the impact changing the model time horizon from 3 years to 50 years has on the ICER.

ICER – Incremental cost-effectiveness ratio, QALY – Quality-adjusted life-year

**Figure S11: Results of the non-probabilistic one-way sensitivity analyses**

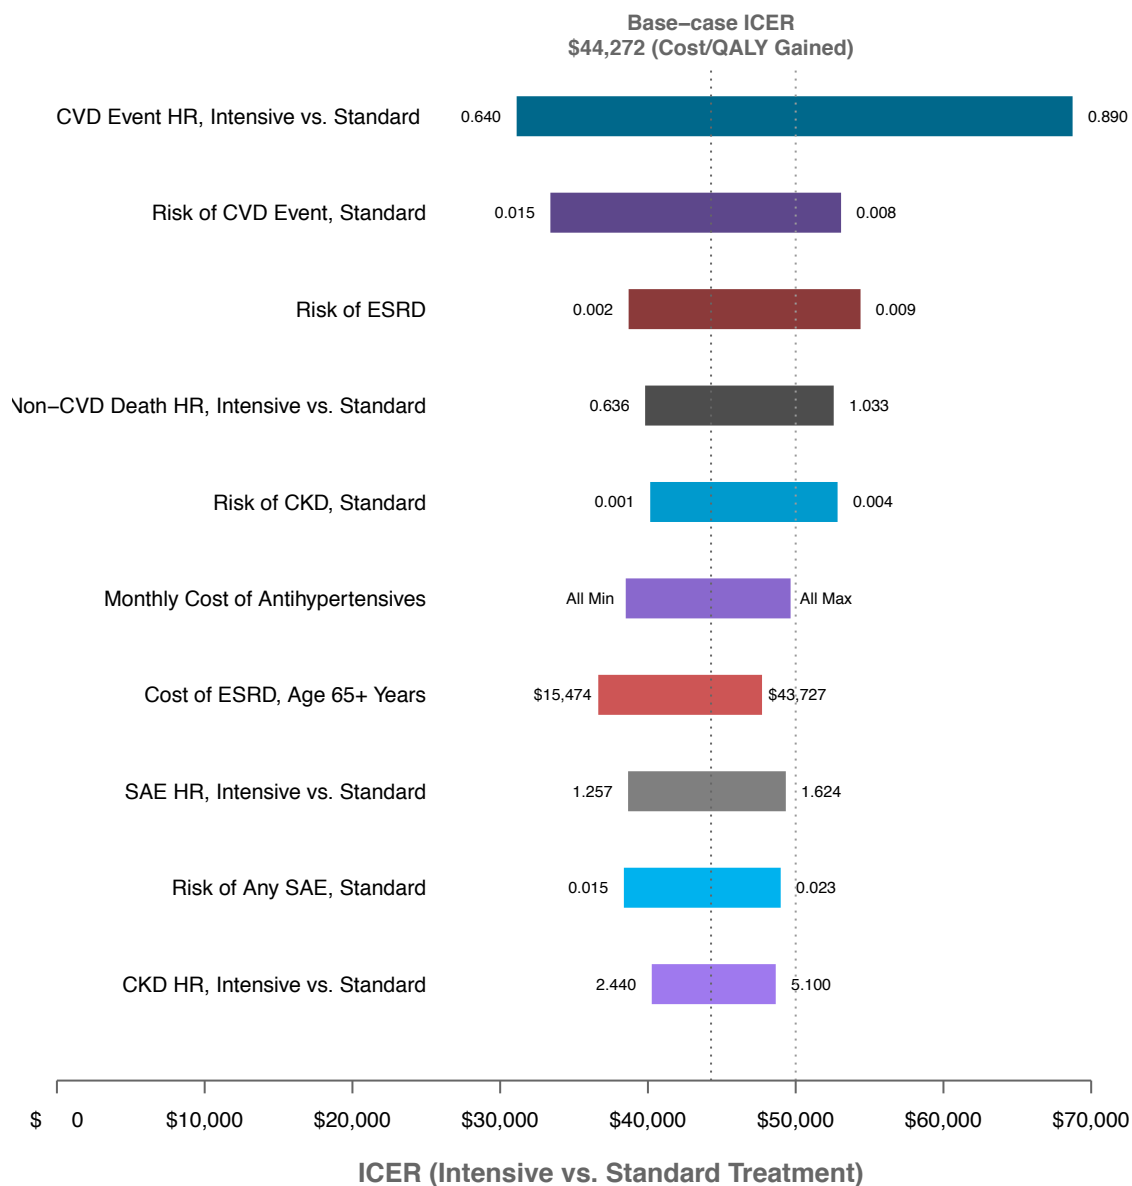

Figure shows the results of the one-way sensitivity analyses where model parameters were varied across a range of plausible values to see the impact on the ICER. The ten parameters to which the model was most sensitive are shown; other parameters changed the ICER by <\$10,000/QALY gained and none caused the ICER to increase to >\$50,000/QALY gained. Plausible ranges were preferentially derived from reported 95% CIs or ranges, or calculated 95% CIs using variance estimates as available. The small numbers/text on the outside of each bar indicate the value of that parameter that resulted in the lowest and highest ICERs.

CI – Confidence interval, CKD – Chronic kidney disease, CVD – Cardiovascular disease, ESRD – End-stage renal disease, HR – Hazard ratio, ICER – Incremental cost-effectiveness ratio, QALY – Quality-adjusted life-year, SAE – Serious adverse event.



**Figure S12: Results of the non-probabilistic threshold analysis of serious adverse events in the post-trial period (Scenario 20)**

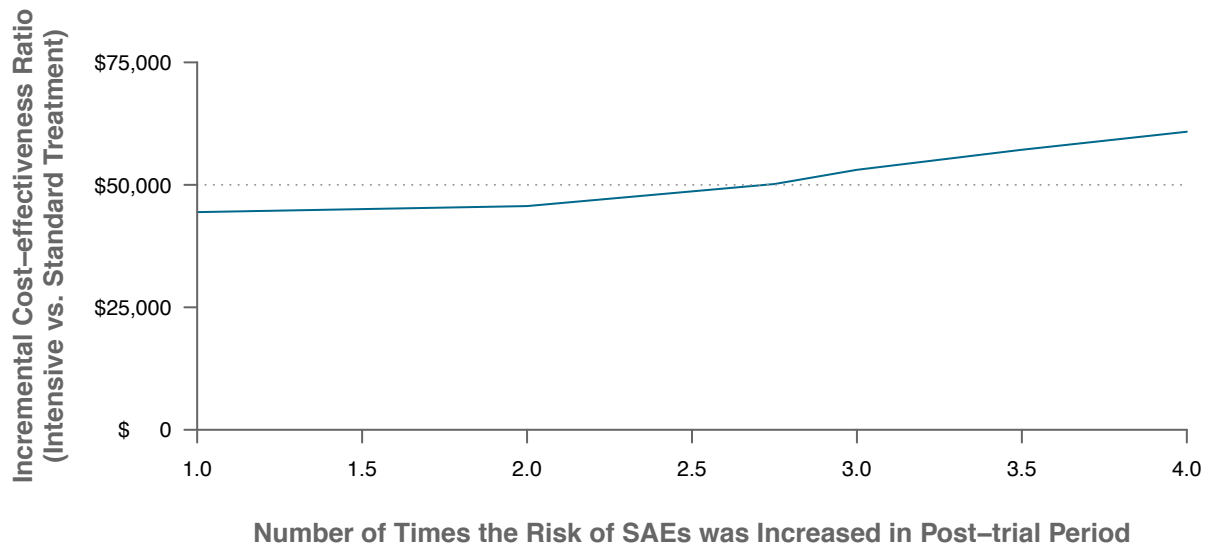

Figure shows the results of the threshold analysis that showed the risk of SAEs in the post-trial period needed to be increased by 2.75 times for intensive SBP treatment to no longer be cost-effective at a \$50,000/QALY willingness-to-pay threshold.

QALY – Quality-adjusted life-year, SAE – Serious adverse event

**Figure S13: Results of the non-probabilistic threshold analysis of intensive vs. standard treatment serious adverse event hazard ratio (Scenario 21)**

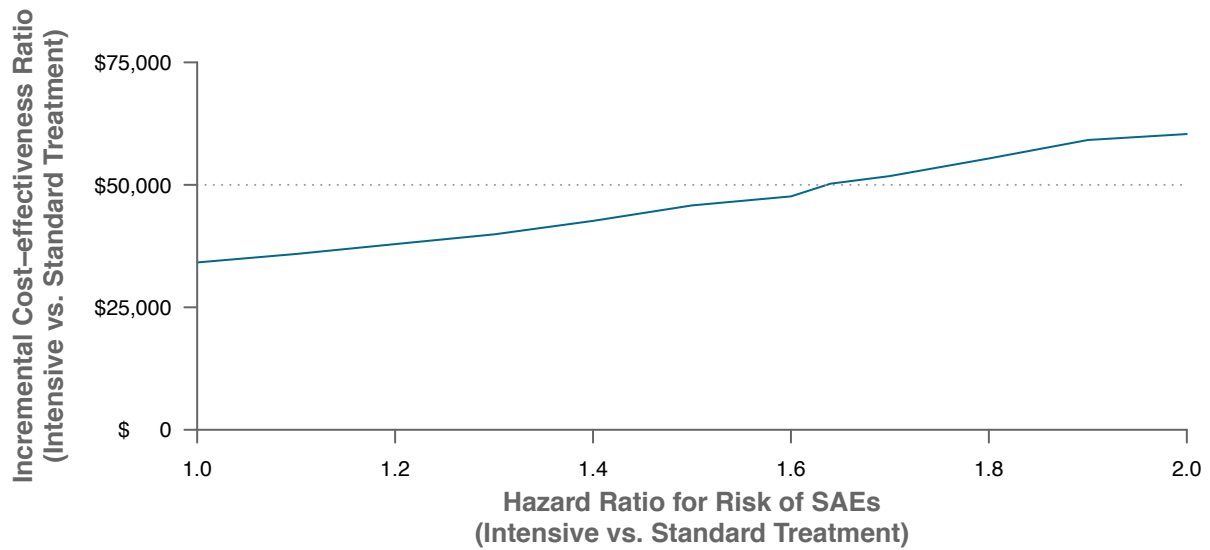

The figure shows the results of the threshold analysis that determined the hazard ratio (intensive vs. standard treatment) for risk of any SAE (i.e., hypotension, bradycardia, electrolyte abnormality, syncope, or acute kidney injury) needed to be 1.64 for intensive SBP treatment to no longer be cost-effective at a \$50,000/QALY willingness-to-pay threshold.

QALY – Quality-adjusted life-year, SAE – Serious adverse event, SBP – Systolic blood pressure.

## SUPPLEMENTARY TABLES

**Table S1. Model input values, ranges, and distributions**

| Parameter                                             | Source                                          | Base-Case Value | SD    | Min | Max | Distribution |
|-------------------------------------------------------|-------------------------------------------------|-----------------|-------|-----|-----|--------------|
| <b>Patient Characteristics</b>                        |                                                 |                 |       |     |     |              |
| <i>Overall Baseline Characteristics</i>               | Derived from overall SPRINT cohort <sup>1</sup> |                 |       |     |     |              |
| Age (years), mean                                     |                                                 | 67.90           | 9.40  |     |     | Normal       |
| Female Sex (%)                                        |                                                 | 35.59%          |       |     |     |              |
| Black (%)                                             |                                                 | 31.48%          |       |     |     |              |
| Current smoker (%)                                    |                                                 | 13.25%          |       |     |     |              |
| CKD (%)                                               |                                                 | 28.26%          |       |     |     |              |
| Clinical CVD (%)                                      |                                                 | 16.68%          |       |     |     |              |
| Baseline SBP (mmHg), mean                             |                                                 | 139.70          | 15.60 |     |     | Normal       |
| Baseline DBP (mmHg), mean                             |                                                 | 78.10           | 11.90 |     |     | Normal       |
| Total cholesterol (mg/dL), mean                       |                                                 | 190.10          | 41.10 |     |     | Normal       |
| HDL-C (mg/dL), mean                                   |                                                 | 52.80           | 14.50 |     |     | Normal       |
| Baseline number of antihypertensive medications, mean |                                                 | 1.80            | 1.00  |     |     | Normal       |

| Parameter                                                                            | Source                       | Base-Case Value | SD    | Min    | Max    | Distribution |
|--------------------------------------------------------------------------------------|------------------------------|-----------------|-------|--------|--------|--------------|
| <i>Number of Antihypertensive Medications Received as Part of Intervention, mean</i> |                              |                 |       |        |        |              |
|                                                                                      | SPRINT <sup>1</sup>          |                 |       |        |        |              |
| Intensive                                                                            |                              | 2.70            | 1.20  | -      | -      | Normal       |
| Standard                                                                             |                              | 1.80            | 1.10  | -      | -      | Normal       |
| <b>Blood Pressure</b>                                                                |                              |                 |       |        |        |              |
| <i>SBP Achieved Due to Intervention (mmHg), mean</i>                                 |                              |                 |       |        |        |              |
|                                                                                      | SPRINT <sup>1</sup>          |                 |       |        |        |              |
| Intensive                                                                            |                              | 121.50          | 1.71  | -      | -      | Normal       |
| Standard                                                                             |                              | 134.60          | 1.86  | -      | -      | Normal       |
| <i>Change in SBP Per Cycle as Patients Age</i>                                       | Franklin et al. <sup>4</sup> | 0.44            | 0.07  | 0.31   | 0.58   | Normal       |
| <b>Probabilities</b>                                                                 |                              |                 |       |        |        |              |
| <i>If CVD event occurred, probability it was:</i>                                    |                              |                 |       |        |        |              |
|                                                                                      | SPRINT <sup>1</sup>          |                 |       |        |        |              |
| Myocardial infarction                                                                |                              |                 |       |        |        |              |
| Intensive                                                                            |                              | 37.16%          | 2.97% | 31.71% | 43.37% | Beta         |
| Standard                                                                             |                              | 35.58%          | 2.64% | 30.73% | 41.08% | Beta         |
| Unstable angina                                                                      |                              |                 |       |        |        |              |
| Intensive                                                                            |                              | 15.33%          | 2.23% | 11.63% | 20.41% | Beta         |

| Parameter     | Source | Base-Case Value | SD    | Min    | Max    | Distribution |
|---------------|--------|-----------------|-------|--------|--------|--------------|
| Standard      |        | 12.27%          | 1.82% | 9.27%  | 16.45% | Beta         |
| Stroke        |        |                 |       |        |        |              |
| Intensive     |        | 23.75%          | 2.62% | 19.17% | 29.48% | Beta         |
| Standard      |        | 21.47%          | 2.27% | 17.50% | 26.41% | Beta         |
| Heart failure |        |                 |       |        |        |              |
| Intensive     |        | 23.75%          | 2.62% | 19.17% | 29.48% | Beta         |
| Standard      |        | 30.67%          | 2.54% | 26.06% | 36.04% | Beta         |

*If SAE Occurred, Probability it was:*

SPRINT<sup>1</sup>

Hypotension

|           |        |       |        |        |      |
|-----------|--------|-------|--------|--------|------|
| Intensive | 19.60% | 1.40% | 17.07% | 22.55% | Beta |
| Standard  | 17.29% | 1.63% | 14.41% | 20.12% | Beta |

Syncope

|           |        |       |        |        |      |
|-----------|--------|-------|--------|--------|------|
| Intensive | 20.22% | 1.41% | 17.65% | 23.20% | Beta |
| Standard  | 21.00% | 1.75% | 17.86% | 24.01% | Beta |

Bradycardia

|           |        |       |        |        |      |
|-----------|--------|-------|--------|--------|------|
| Intensive | 12.90% | 1.18% | 10.82% | 15.46% | Beta |
|-----------|--------|-------|--------|--------|------|

| Parameter                                           | Source                                             | Base-Case Value | SD     | Min    | Max    | Distribution |
|-----------------------------------------------------|----------------------------------------------------|-----------------|--------|--------|--------|--------------|
| Standard                                            |                                                    | 15.43%          | 1.56%  | 12.71% | 18.15% | Beta         |
| Electrolyte abnormality                             |                                                    |                 |        |        |        |              |
| Intensive                                           |                                                    | 21.96%          | 1.46%  | 19.30% | 25.01% | Beta         |
| Standard                                            |                                                    | 23.98%          | 1.84%  | 20.65% | 27.11% | Beta         |
| Acute kidney injury                                 |                                                    |                 |        |        |        |              |
| Intensive                                           |                                                    | 25.31%          | 1.53%  | 22.49% | 28.49% | Beta         |
| Standard                                            |                                                    | 22.30%          | 1.79%  | 19.08% | 25.37% | Beta         |
| <i>Probability SAE was fatal</i>                    | H-CUP <sup>17</sup>                                |                 |        |        |        |              |
| Hypotension                                         |                                                    | 1.02%           | 0.03%  | 0.96%  | 1.09%  | Beta         |
| Syncope                                             |                                                    | 0.18%           | 0.01%  | 0.16%  | 0.20%  | Beta         |
| Bradycardia                                         |                                                    | 0.90%           | 0.02%  | 0.85%  | 0.95%  | Beta         |
| Electrolyte abnormality                             |                                                    | 1.15%           | 0.02%  | 1.12%  | 1.19%  | Beta         |
| Acute kidney injury                                 |                                                    | 3.14%           | 0.02%  | 3.10%  | 3.19%  | Beta         |
| <i>Medication Adherence After First Five Years*</i> |                                                    |                 |        |        |        |              |
| Number of antihypertensive medications              |                                                    |                 |        |        |        |              |
| 0 (Assumed to be lifestyle modifications)           | Jones et al. <sup>7</sup> , Xu et al. <sup>8</sup> | 69.56%          | 12.74% | 35.03% | 85.98% | Beta         |

| Parameter | Source                        | Base-Case Value | SD    | Min    | Max    | Distribution |
|-----------|-------------------------------|-----------------|-------|--------|--------|--------------|
| 1         | Iskedjian et al. <sup>6</sup> | 91.40%          | 2.20% | 89.24% | 93.27% | Beta         |
| 2         | Iskedjian et al. <sup>6</sup> | 87.10%          | 2.90% | 85.36% | 88.72% | Beta         |
| 3+        | Iskedjian et al. <sup>6</sup> | 83.20%          | 3.50% | 82.01% | 82.01% | Beta         |

### Costs (2017 USD)

| <i>Acute CVD Event Costs (Per Episode)</i> | H-CUP <sup>17</sup> |          |         |          |          |       |
|--------------------------------------------|---------------------|----------|---------|----------|----------|-------|
| Unstable angina                            |                     |          |         |          |          |       |
| 50-64                                      |                     | \$7,254  | \$440   | \$6,592  | \$8,318  | Gamma |
| 65-84                                      |                     | \$7,442  | \$382   | \$6,563  | \$8,060  | Gamma |
| ≥85                                        |                     | \$5,618  | \$457   | \$5,345  | \$7,137  | Gamma |
| Myocardial infarction                      |                     |          |         |          |          |       |
| 50-64                                      |                     | \$22,134 | \$3,837 | \$14,093 | \$29,135 | Gamma |
| 65-84                                      |                     | \$22,004 | \$4,101 | \$13,983 | \$30,058 | Gamma |
| ≥85                                        |                     | \$13,903 | \$3,753 | \$8,138  | \$22,849 | Gamma |
| Heart failure                              |                     |          |         |          |          |       |
| 50-64                                      |                     | \$11,179 | \$1,145 | \$11,164 | \$15,653 | Gamma |
| 65-84                                      |                     | \$10,218 | \$1,150 | \$10,216 | \$14,725 | Gamma |

| Parameter                      | Source              | Base-Case Value | SD       | Min      | Max      | Distribution |
|--------------------------------|---------------------|-----------------|----------|----------|----------|--------------|
| ≥85                            |                     | \$8,744         | \$1,370  | \$5,805  | \$11,179 | Gamma        |
| Stroke                         |                     |                 |          |          |          |              |
| 50-64                          |                     | \$16,248        | \$14,423 | \$5,624  | \$62,162 | Gamma        |
| 65-84                          |                     | \$12,478        | \$10,075 | \$5,371  | \$44,865 | Gamma        |
| ≥85                            |                     | \$10,119        | \$5,601  | \$6,267  | \$28,222 | Gamma        |
| Fatal CVD event                |                     |                 |          |          |          |              |
| 50-64                          |                     | \$18,597        | \$5,081  | \$11,705 | \$31,622 | Gamma        |
| 65-84                          |                     | \$17,157        | \$4,483  | \$11,309 | \$28,887 | Gamma        |
| ≥85                            |                     | \$11,753        | \$3,333  | \$7,482  | \$20,547 | Gamma        |
| <i>SAE Costs (Per Episode)</i> | H-CUP <sup>17</sup> |                 |          |          |          |              |
| Hypotension                    |                     |                 |          |          |          |              |
| 50-64                          |                     | \$7,296         | \$817    | \$7,074  | \$10,274 | Gamma        |
| 65-84                          |                     | \$7,331         | \$237    | \$7,160  | \$8,086  | Gamma        |
| ≥85                            |                     | \$6,607         | \$182    | \$5,880  | \$7,099  | Gamma        |
| Syncope                        |                     |                 |          |          |          |              |
| 50-64                          |                     | \$6,593         | \$225    | \$6,152  | \$7,033  | Gamma        |



| Parameter                                                     | Source | Base-Case Value                                      | SD      | Min     | Max      | Distribution |
|---------------------------------------------------------------|--------|------------------------------------------------------|---------|---------|----------|--------------|
| 65-84                                                         |        | \$6,801                                              | \$225   | \$6,361 | \$7,241  | Gamma        |
| ≥85                                                           |        | \$6,662                                              | \$182   | \$6,304 | \$7,021  | Gamma        |
| Bradycardia                                                   |        |                                                      |         |         |          |              |
| 50-64                                                         |        | \$10,807                                             | \$2,165 | \$8,905 | \$17,391 | Gamma        |
| 65-84                                                         |        | \$12,372                                             | \$1,952 | \$9,126 | \$16,776 | Gamma        |
| ≥85                                                           |        | \$11,941                                             | \$1,885 | \$8,450 | \$15,841 | Gamma        |
| Electrolyte abnormality                                       |        |                                                      |         |         |          |              |
| 50-64                                                         |        | \$7,139                                              | \$1,207 | \$4,850 | \$9,582  | Gamma        |
| 65-84                                                         |        | \$7,144                                              | \$1,270 | \$4,923 | \$9,901  | Gamma        |
| ≥85                                                           |        | \$6,572                                              | \$1,529 | \$3,080 | \$9,072  | Gamma        |
| AKI                                                           |        |                                                      |         |         |          |              |
| 50-64                                                         |        | \$10,219                                             | \$2,676 | \$6,692 | \$17,183 | Gamma        |
| 65-84                                                         |        | \$9,862                                              | \$2,459 | \$7,290 | \$16,929 | Gamma        |
| ≥85                                                           |        | \$8,542                                              | \$2,005 | \$6,569 | \$14,429 | Gamma        |
| <i>Incremental Long-term Post-CVD Event Costs (Per Cycle)</i> |        | CDC Chronic Disease Cost Calculator <sup>14,15</sup> |         |         |          |              |

| Parameter                                                                             | Source                                               | Base-Case Value | SD        | Min           | Max       | Distribution |
|---------------------------------------------------------------------------------------|------------------------------------------------------|-----------------|-----------|---------------|-----------|--------------|
| Post-MI (assumed to be cost of CHD)                                                   |                                                      |                 |           |               |           |              |
| 50-64                                                                                 |                                                      | \$3,013         | \$220     | \$2,597       | \$3,460   | Gamma        |
| ≥65                                                                                   |                                                      | \$5,184         | \$379     | \$4,470       | \$5,952   | Gamma        |
| Post-unstable angina (assumed to be cost of CHD)                                      |                                                      |                 |           |               |           |              |
| 50-64                                                                                 |                                                      | \$3,013         | \$220     | \$2,597       | \$3,460   | Gamma        |
| ≥65                                                                                   |                                                      | \$5,184         | \$379     | \$4,470       | \$5,952   | Gamma        |
| Heart failure                                                                         |                                                      |                 |           |               |           |              |
| 50-64                                                                                 |                                                      | \$3,698         | \$268     | \$3,229       | \$4,278   | Gamma        |
| ≥65                                                                                   |                                                      | \$6,364         | \$461     | \$5,554       | \$7,361   | Gamma        |
| Acute stroke rehabilitation costs (first year post-stroke, 6-month cycle cost shown)  | Moran et al. <sup>10</sup>                           | \$8,705         | \$1,088   | \$6,529       | \$10,881  | Gamma        |
| Post-stroke (per cycle cost in subsequent years)                                      | CDC Chronic Disease Cost Calculator <sup>14,15</sup> |                 |           |               |           |              |
| 50-64                                                                                 |                                                      | \$5,334         | \$331     | \$4,836       | \$6,137   | Gamma        |
| ≥65                                                                                   |                                                      | \$10,474        | \$712     | \$9,456       | \$12,247  | Gamma        |
| <i>Non-CVD Background Costs (experienced by all simulated individuals; per cycle)</i> | Moran et al. <sup>10</sup>                           | <b>Male</b>     | <b>SD</b> | <b>Female</b> | <b>SD</b> |              |

| Parameter                                                                            | Source | Base-Case Value                              | SD       | Min      | Max      | Distribution |       |
|--------------------------------------------------------------------------------------|--------|----------------------------------------------|----------|----------|----------|--------------|-------|
| 50-54                                                                                |        | \$2,096                                      | \$262    | \$3,040  | \$380    | Gamma        |       |
| 55-64                                                                                |        | \$2,793                                      | \$349    | \$4,374  | \$547    | Gamma        |       |
| 65-74                                                                                |        | \$4,153                                      | \$519    | \$5,371  | \$671    | Gamma        |       |
| 75-84                                                                                |        | \$6,285                                      | \$786    | \$8,009  | \$1,001  | Gamma        |       |
| ≥85                                                                                  |        | \$12,048                                     | \$1,506  | \$14,054 | \$1,757  | Gamma        |       |
| <i>Long-term ESRD Costs (Used as Non-CVD background costs after developing ESRD)</i> |        | USRDS <sup>16</sup>                          | \$34,933 | \$7,207  | \$15,474 | \$43,727     | Gamma |
| <i>Medication Costs (Monthly)</i>                                                    |        |                                              |          |          |          |              |       |
| Number of antihypertensive medications                                               |        | SPRINT <sup>1</sup> , RED BOOK <sup>30</sup> |          |          |          |              |       |
| 0                                                                                    |        | \$0                                          | -        | -        | -        | -            |       |
| 1                                                                                    |        | \$14                                         | \$18     | \$3      | \$83     | Gamma        |       |
| 2                                                                                    |        | \$31                                         | \$24     | \$7      | \$137    | Gamma        |       |
| 3                                                                                    |        | \$50                                         | \$27     | \$11     | \$167    | Gamma        |       |
| 4                                                                                    |        | \$70                                         | \$27     | \$18     | \$174    | Gamma        |       |
| 5                                                                                    |        | \$95                                         | \$29     | \$28     | \$179    | Gamma        |       |
| <i>Office Visit Costs (Per Episode)</i>                                              |        |                                              |          |          |          |              |       |

| Parameter                                         | Source                                   | Base-Case Value | SD  | Min  | Max   | Distribution |
|---------------------------------------------------|------------------------------------------|-----------------|-----|------|-------|--------------|
| Office visit                                      | CMS Physician Fee Schedule <sup>12</sup> | \$111           | \$8 | \$91 | \$140 | Gamma        |
| Number of office visits per year <sup>31,32</sup> |                                          |                 |     |      |       |              |
| Intensive                                         |                                          | 4               |     |      |       |              |
| Standard                                          |                                          | 3               |     |      |       |              |
| Electrolyte monitoring                            | CMS Lab Fee Schedule <sup>13</sup>       | \$11            | \$1 | \$9  | \$12  | Gamma        |
| Number of times monitored per year                |                                          |                 |     |      |       |              |
| Intensive                                         |                                          | 2               |     |      |       |              |
| Standard                                          |                                          | 1               |     |      |       |              |

### Utilities

| Model Comorbidities        | Sullivan et al. <sup>21</sup> |      |      |      |      |  |
|----------------------------|-------------------------------|------|------|------|------|--|
| Hypertension               | 1.00                          | -    | -    | -    | -    |  |
| Stable angina              | 0.70                          | 0.08 | 0.52 | 0.83 | Beta |  |
| Post-myocardial infarction | 0.70                          | 0.07 | 0.58 | 0.84 | Beta |  |
| Heart failure              | 0.64                          | 0.10 | 0.44 | 0.81 | Beta |  |
| Post-stroke                | 0.65                          | 0.09 | 0.46 | 0.82 | Beta |  |

| Parameter                                 | Source                                                                            | Base-Case Value | SD   | Min   | Max   | Distribution |
|-------------------------------------------|-----------------------------------------------------------------------------------|-----------------|------|-------|-------|--------------|
| ESRD                                      |                                                                                   | 0.65            | 0.08 | 0.51  | 0.82  | Beta         |
| <i>Acute Event Disutility</i>             |                                                                                   |                 |      |       |       |              |
| CVD events (1 month in duration)          | Moran et al. <sup>10</sup> , King et al. <sup>19</sup> , Yao et al. <sup>20</sup> | -0.10           | 0.03 | -0.08 | -0.13 | Beta         |
| Acute kidney injury (1 month in duration) | Assumed same as acute CVD event                                                   | -0.10           | 0.03 | -0.08 | -0.13 | Beta         |
| Other SAEs (0.5 months in duration)       | Assumed same as acute CVD event but shorter in duration                           | -0.10           | 0.03 | -0.08 | -0.13 | Beta         |

Minimum and maximum values were preferentially derived from reported 95% confidence intervals or ranges, or calculated 95% confidence intervals using variance estimates as available.

CDC – Centers for Disease Control and Prevention, CHD – Coronary heart disease, CKD – Chronic kidney disease, CMS – Centers for Medicare and Medicaid Services, CVD – Cardiovascular disease, DBP – Diastolic blood pressure, ESRD – End-stage renal disease, H-CUP – Healthcare Cost and Utilization Project, HDL-C – High density lipoprotein cholesterol, SAE – Serious adverse event, SBP – Systolic blood pressure, SD – Standard deviation, SPRINT – Systolic Blood Pressure Intervention Trial, USD – United States dollars, USRDS – United States Renal Data System.

**Table S2: Key assumptions regarding risk of clinical events in the four post-trial period adherence and treatment effect scenarios**

| Scenario          | First 5 years<br>(planned SPRINT follow up)                                                                                                                                                                                                                                                                                                                                                     | After the first 5 years<br>(model projection of SPRINT results)                                                                                                                |                                                                                                                                                                                                                                                                                                                                                                                                                                                                                                                                                                                                                                              |                                                                                                                                                                                                                                                                                                                                                                                                                                            |                                                                                                                                                                                                                                                                                                                                                                                                                                                                              |
|-------------------|-------------------------------------------------------------------------------------------------------------------------------------------------------------------------------------------------------------------------------------------------------------------------------------------------------------------------------------------------------------------------------------------------|--------------------------------------------------------------------------------------------------------------------------------------------------------------------------------|----------------------------------------------------------------------------------------------------------------------------------------------------------------------------------------------------------------------------------------------------------------------------------------------------------------------------------------------------------------------------------------------------------------------------------------------------------------------------------------------------------------------------------------------------------------------------------------------------------------------------------------------|--------------------------------------------------------------------------------------------------------------------------------------------------------------------------------------------------------------------------------------------------------------------------------------------------------------------------------------------------------------------------------------------------------------------------------------------|------------------------------------------------------------------------------------------------------------------------------------------------------------------------------------------------------------------------------------------------------------------------------------------------------------------------------------------------------------------------------------------------------------------------------------------------------------------------------|
|                   | All patients                                                                                                                                                                                                                                                                                                                                                                                    | Adherence definition                                                                                                                                                           | SBP and anti-HTN medications                                                                                                                                                                                                                                                                                                                                                                                                                                                                                                                                                                                                                 | Probability of events                                                                                                                                                                                                                                                                                                                                                                                                                      |                                                                                                                                                                                                                                                                                                                                                                                                                                                                              |
|                   |                                                                                                                                                                                                                                                                                                                                                                                                 |                                                                                                                                                                                |                                                                                                                                                                                                                                                                                                                                                                                                                                                                                                                                                                                                                                              | Adherent patients                                                                                                                                                                                                                                                                                                                                                                                                                          | Non-adherent                                                                                                                                                                                                                                                                                                                                                                                                                                                                 |
| <b>Base-case</b>  | <p><i>Adherence:</i></p> <ul style="list-style-type: none"> <li>All patients adherent to therapy</li> </ul> <p><i>Event Probabilities:</i></p> <ul style="list-style-type: none"> <li>SAEs: as observed in SPRINT</li> <li>First CVD event: as observed in SPRINT</li> <li>Repeat CVD event: derived from Pooled Cohort risk equations</li> <li>Non-CVD death: as observed in SPRINT</li> </ul> | <ul style="list-style-type: none"> <li>Intermittently adherent based on number of anti-HTN meds</li> <li>All patients permanently non-adherent after first 15 years</li> </ul> | <p><i>Adherent</i></p> <ul style="list-style-type: none"> <li>SPRINT treatment SBP persists</li> </ul> <p><i>Non-Adherent</i></p> <ul style="list-style-type: none"> <li>SBP returns to baseline value (no reduction)</li> </ul> <p><i>All Patients</i></p> <ul style="list-style-type: none"> <li>SBP increases over time (0.89 mmHg/year)<sup>4</sup></li> <li>1 anti-HTN med added per each 10 mmHg increase in SBP over goal</li> <li>9.1 mmHg reduction in SBP/additional med added<sup>5</sup></li> <li>5 anti-HTN med max</li> <li>If patient experiences SAE, 1 anti-HTN removed and 9.1 mmHg increase in SBP<sup>5</sup></li> </ul> | <p>SAEs</p> <ul style="list-style-type: none"> <li>As observed in SPRINT</li> </ul> <p><i>First CVD event</i></p> <ul style="list-style-type: none"> <li>As observed in SPRINT</li> </ul> <p><i>Repeat CVD event</i></p> <ul style="list-style-type: none"> <li>Derived from Pooled Cohort<sup>33</sup></li> </ul> <p><i>Non-CVD death</i></p> <ul style="list-style-type: none"> <li>Derived from CDC life-tables<sup>34</sup></li> </ul> | <p>SAEs</p> <ul style="list-style-type: none"> <li>As observed in standard arm of SPRINT</li> </ul> <p><i>First CVD event</i></p> <ul style="list-style-type: none"> <li>Derived from Pooled Cohort<sup>33</sup></li> </ul> <p><i>Repeat CVD event</i></p> <ul style="list-style-type: none"> <li>Derived from Pooled Cohort<sup>33</sup></li> </ul> <p><i>Non-CVD death</i></p> <ul style="list-style-type: none"> <li>Derived from CDC life-tables<sup>34</sup></li> </ul> |
| <b>Worst-case</b> | <ul style="list-style-type: none"> <li>Same as base-case</li> </ul>                                                                                                                                                                                                                                                                                                                             | <ul style="list-style-type: none"> <li>All patients permanently non-adherent at 5 years</li> </ul>                                                                             | <ul style="list-style-type: none"> <li>Same as base-case</li> </ul>                                                                                                                                                                                                                                                                                                                                                                                                                                                                                                                                                                          | <ul style="list-style-type: none"> <li>N/A (all patients non-adherent)</li> </ul>                                                                                                                                                                                                                                                                                                                                                          | <ul style="list-style-type: none"> <li>Same as base-case</li> </ul>                                                                                                                                                                                                                                                                                                                                                                                                          |

|                                 |                                                                                                                                                                                                                                                                                                                                                       |                                                                                                                                                                    |                                                                       |                                                                                                                                                                                                                                                                                                                                                                                                          |                                                                                 |
|---------------------------------|-------------------------------------------------------------------------------------------------------------------------------------------------------------------------------------------------------------------------------------------------------------------------------------------------------------------------------------------------------|--------------------------------------------------------------------------------------------------------------------------------------------------------------------|-----------------------------------------------------------------------|----------------------------------------------------------------------------------------------------------------------------------------------------------------------------------------------------------------------------------------------------------------------------------------------------------------------------------------------------------------------------------------------------------|---------------------------------------------------------------------------------|
| <b>Best-case until 15 years</b> | <p><i>Event Probabilities:</i></p> <ul style="list-style-type: none"> <li>• SAEs: as observed in SPRINT</li> <li>• <i>First or repeat CVD event:</i> as observed in SPRINT</li> <li>• <i>Non-CVD death:</i> as observed in SPRINT</li> </ul>                                                                                                          | <ul style="list-style-type: none"> <li>• All patients adherent for first 15 years</li> <li>• All patients permanently non-adherent after first 15 years</li> </ul> | <ul style="list-style-type: none"> <li>• Same as base-case</li> </ul> | <ul style="list-style-type: none"> <li>• First CVD event, SAEs, and Non-CVD Death same as base-case</li> </ul> <p><i>Repeat CVD event</i></p> <ul style="list-style-type: none"> <li>• First 15 years, as observed in SPRINT</li> </ul>                                                                                                                                                                  | <ul style="list-style-type: none"> <li>• Same as base-case</li> </ul>           |
| <b>Best-case</b>                | <p><i>Event Probabilities:</i></p> <ul style="list-style-type: none"> <li>• SAEs: as observed in SPRINT based on age, &lt;75 vs. ≥75 years</li> <li>• <i>First or repeat CVD event:</i> as observed in SPRINT based on age, &lt;75 vs. ≥75 years</li> <li>• <i>Non-CVD death:</i> as observed in SPRINT based on age, &lt;75 vs. ≥75 years</li> </ul> | <ul style="list-style-type: none"> <li>• All patients over their entire lifetime</li> </ul>                                                                        | <ul style="list-style-type: none"> <li>• Same as base-case</li> </ul> | <p>SAEs</p> <ul style="list-style-type: none"> <li>• As observed in SPRINT based on age, &lt;75 vs. ≥75 years</li> </ul> <p><i>First or repeat CVD event:</i></p> <ul style="list-style-type: none"> <li>• As observed in SPRINT based on age, &lt;75 vs. ≥75 years</li> </ul> <p><i>Non-CVD death</i></p> <ul style="list-style-type: none"> <li>• Derived from CDC life-tables<sup>34</sup></li> </ul> | <ul style="list-style-type: none"> <li>• N/A (all patients adherent)</li> </ul> |

Anti-HTN – antihypertensive, CDC – Centers for Disease Control and Prevention, CVD – cardiovascular disease, mmHg – Millimeters of mercury, N/A – not applicable, SAE – serious adverse event, SBP – systolic blood pressure, SPRINT – Systolic Blood Pressure Intervention Trial.

**Table S3: Key assumptions regarding alternate antihypertensive medication adherence scenarios**

| #  | Scenario                        | First 5 years<br>(planned SPRINT follow up) |                                            |                                                                                                                                          | After the first 5 years<br>(model projection of SPRINT results) |                                                                                                                                                                                          |                                                                                                                                                                                                                                                                                 |
|----|---------------------------------|---------------------------------------------|--------------------------------------------|------------------------------------------------------------------------------------------------------------------------------------------|-----------------------------------------------------------------|------------------------------------------------------------------------------------------------------------------------------------------------------------------------------------------|---------------------------------------------------------------------------------------------------------------------------------------------------------------------------------------------------------------------------------------------------------------------------------|
|    |                                 | Adherence Classification                    | Assumption                                 | Probability adherent                                                                                                                     | Adherence Classification                                        | Assumption                                                                                                                                                                               | Probability adherent                                                                                                                                                                                                                                                            |
| 1. | <b>Base-case</b>                | Adherent vs. Non-adherent                   | All patients adherent to therapy           | 1.0                                                                                                                                      | Adherent vs. Non-adherent                                       | <ul style="list-style-type: none"> <li>• 5-15 years: Intermittent adherence based on number of anti-HTN meds</li> <li>• After 15 years: All patients permanently non-adherent</li> </ul> | <ul style="list-style-type: none"> <li>• 5-15 years:                             <ul style="list-style-type: none"> <li>○ 1 med: 0.91<sup>6</sup></li> <li>○ 2 meds: 0.87<sup>6</sup></li> <li>○ ≥3 med: 0.83<sup>6</sup></li> </ul> </li> <li>• After 15 years: 0.0</li> </ul> |
| 2. | <b>Worst-case</b>               |                                             | Same as base-case                          |                                                                                                                                          | Adherent vs. Non-adherent                                       | <ul style="list-style-type: none"> <li>• All patients permanently non-adherent at 5 years</li> </ul>                                                                                     | <ul style="list-style-type: none"> <li>• 0.0</li> </ul>                                                                                                                                                                                                                         |
| 3. | <b>Best-case until 15 years</b> |                                             | Same as base-case                          |                                                                                                                                          | Adherent vs. Non-adherent                                       | <ul style="list-style-type: none"> <li>• All patients adherent for first 15 years</li> <li>• All patients permanently non-adherent after first 15 years</li> </ul>                       | <ul style="list-style-type: none"> <li>• 5-15 years: 1.0</li> <li>• After 15 years: 0.0</li> </ul>                                                                                                                                                                              |
| 4. | <b>Best-case</b>                |                                             | Same as base-case                          |                                                                                                                                          | Adherent vs. Non-adherent                                       | <ul style="list-style-type: none"> <li>• All patients permanently adherent to intensive treatment over their lifetime</li> </ul>                                                         | <ul style="list-style-type: none"> <li>• After 5 years: 1.0 each cycle</li> </ul>                                                                                                                                                                                               |
| 5. | <b>In-trial non-adherence</b>   | Adherent vs. Non-adherent                   | Adherence based on number of anti-HTN meds | Probability intermittently adherent <sup>6</sup> <ul style="list-style-type: none"> <li>○ 1 med: 0.91</li> <li>○ 2 meds: 0.87</li> </ul> |                                                                 | Same as base-case                                                                                                                                                                        |                                                                                                                                                                                                                                                                                 |



| #  | Scenario                                                      | First 5 years<br>(planned SPRINT follow up) |                                                                                                                                                                                               |                                                                                                                                                                                                                                                                                     | After the first 5 years<br>(model projection of SPRINT results) |                                                                                                                                                                                  |                                                                                                                                                                                                                                                                                                        |
|----|---------------------------------------------------------------|---------------------------------------------|-----------------------------------------------------------------------------------------------------------------------------------------------------------------------------------------------|-------------------------------------------------------------------------------------------------------------------------------------------------------------------------------------------------------------------------------------------------------------------------------------|-----------------------------------------------------------------|----------------------------------------------------------------------------------------------------------------------------------------------------------------------------------|--------------------------------------------------------------------------------------------------------------------------------------------------------------------------------------------------------------------------------------------------------------------------------------------------------|
|    |                                                               | Adherence<br>Classification                 | Assumption                                                                                                                                                                                    | Probability<br>adherent                                                                                                                                                                                                                                                             | Adherence<br>Classification                                     | Assumption                                                                                                                                                                       | Probability<br>adherent                                                                                                                                                                                                                                                                                |
|    |                                                               |                                             |                                                                                                                                                                                               | <ul style="list-style-type: none"> <li>○ ≥3 med:<br/>0.83<sup>6</sup></li> </ul>                                                                                                                                                                                                    |                                                                 |                                                                                                                                                                                  |                                                                                                                                                                                                                                                                                                        |
| 6. | <b><i>In trial discontinuation and non-adherence</i></b>      | Adherent vs. Non-adherent                   | <p>Patients were at risk of permanent discontinuation during 1<sup>st</sup> year of treatment</p> <p>If patients did not discontinue, patients were at risk of intermittent non-adherence</p> | <p>Probability permanently discontinue in 1<sup>st</sup> year: 0.25<sup>35</sup></p> <p>Probability intermittently adherent</p> <ul style="list-style-type: none"> <li>• 1 med: 0.91<sup>6</sup></li> <li>• 2 meds: 0.87<sup>6</sup></li> <li>• ≥3 med: 0.83<sup>6</sup></li> </ul> |                                                                 | Same as base-case                                                                                                                                                                |                                                                                                                                                                                                                                                                                                        |
| 7. | <b><i>Alternate adherence estimates (post-trial only)</i></b> |                                             | Same as base-case                                                                                                                                                                             |                                                                                                                                                                                                                                                                                     | Adherent vs. Non-adherent                                       | <ul style="list-style-type: none"> <li>• 5-15 years: Intermittent non-adherence based on number of anti-HTN meds</li> <li>• After 15 years: All patients non-adherent</li> </ul> | <ul style="list-style-type: none"> <li>• 5-15 years: <ul style="list-style-type: none"> <li>○ 1 med: 0.79<sup>36</sup></li> <li>○ 2 meds: 0.69<sup>36</sup></li> <li>○ 3 meds: 0.65<sup>36</sup></li> <li>○ 4 meds: 0.51<sup>36</sup></li> </ul> </li> <li>• After 15 years: 0.0 each cycle</li> </ul> |

| #  | Scenario                                                | First 5 years<br>(planned SPRINT follow up) |                   |                         | After the first 5 years<br>(model projection of SPRINT results) |                                                                                                                                                                                                                                                                                                                                                                                                                               |                                                                                                                                                                                                                                                                                                |
|----|---------------------------------------------------------|---------------------------------------------|-------------------|-------------------------|-----------------------------------------------------------------|-------------------------------------------------------------------------------------------------------------------------------------------------------------------------------------------------------------------------------------------------------------------------------------------------------------------------------------------------------------------------------------------------------------------------------|------------------------------------------------------------------------------------------------------------------------------------------------------------------------------------------------------------------------------------------------------------------------------------------------|
|    |                                                         | Adherence<br>Classificatio<br>n             | Assumption        | Probability<br>adherent | Adherence<br>Classificatio<br>n                                 | Assumption                                                                                                                                                                                                                                                                                                                                                                                                                    | Probability<br>adherent                                                                                                                                                                                                                                                                        |
| 8. | <b>Permanent discontinuation post-trial period only</b> |                                             | Same as base-case |                         | Adherent vs. Non-adherent                                       | <ul style="list-style-type: none"> <li>5-15 years: Intermittent non-adherence based on number of anti-HTN meds</li> <li>After 15 years: All patients non-adherent</li> </ul>                                                                                                                                                                                                                                                  | <ul style="list-style-type: none"> <li>5-15 years: <ul style="list-style-type: none"> <li>1 med: 0.91<sup>6</sup></li> <li>2 meds: 0.87<sup>6</sup></li> <li>≥3 med: 0.83<sup>6</sup></li> </ul> </li> <li>After 1<sup>st</sup> time non-adherent: 0.0</li> <li>After 15 years: 0.0</li> </ul> |
| 9. | <b>Moderate post-trial medication adherence.</b>        |                                             | Same as base-case |                         | Non-adherent, Moderately adherent, or Adherent                  | <ul style="list-style-type: none"> <li>5-15 years: Intermittent adherence based on number of anti-HTN meds</li> <li>After 15 years: All patients permanently non-adherent</li> <li>Based on Will et al.,<sup>37</sup> individuals could be intermittently moderately adherent or non-adherent</li> <li>Based on Will et al.,<sup>37</sup> CVD event risk modified for moderately adherent compared to non-adherent</li> </ul> | Adherent <ul style="list-style-type: none"> <li>1 med: 0.91<sup>6</sup></li> <li>2 meds: 0.87<sup>6</sup></li> <li>≥3 med: 0.83<sup>6</sup></li> </ul> If less than adherent, probability moderately adherent: 0.63 <sup>6</sup>                                                               |

| #  | Scenario                                               | First 5 years<br>(planned SPRINT follow up) |                                                                                                                                                           |                                                                                                                                                | After the first 5 years<br>(model projection of SPRINT results) |                                                                                                                                  |                                                                                       |
|----|--------------------------------------------------------|---------------------------------------------|-----------------------------------------------------------------------------------------------------------------------------------------------------------|------------------------------------------------------------------------------------------------------------------------------------------------|-----------------------------------------------------------------|----------------------------------------------------------------------------------------------------------------------------------|---------------------------------------------------------------------------------------|
|    |                                                        | Adherence<br>Classification                 | Assumption                                                                                                                                                | Probability<br>adherent                                                                                                                        | Adherence<br>Classification                                     | Assumption                                                                                                                       | Probability<br>adherent                                                               |
|    |                                                        |                                             |                                                                                                                                                           |                                                                                                                                                |                                                                 | patients (HR:<br>0.93, 95%CI<br>0.92-0.94)                                                                                       |                                                                                       |
| 10 | <b>SPRINT<br/>Observed<br/>Adherence<br/>Estimates</b> | Adherent vs.<br>Non-adherent                | Self-reported<br>adherence<br>measured by<br>Morisky scale<br><br>Event risks as<br>observed in<br>SPRINT<br>Direct Medical<br>Costs tied to<br>adherence | Probability<br>intermittently<br>adherent<br>○ 1 med: 0.82<br>○ 2 meds:<br>0.86<br>○ 3 meds:<br>0.86<br>○ 4 meds:<br>0.83<br>○ 5 meds:<br>0.81 | Adherent vs.<br>Non-adherent                                    | Intermittent<br>adherence based<br>on number of anti-<br>HTN meds<br><br>Direct medical<br>costs and events<br>tied to adherence | ○ 1 med: 0.82<br>○ 2 meds: 0.86<br>○ 3 meds: 0.86<br>○ 4 meds: 0.83<br>○ 5 meds: 0.81 |

Anti-HTN – antihypertensive, CI – Confidence interval, CVD – Cardiovascular disease, HR – Hazard ratio, SPRINT – Systolic Blood Pressure Intervention Trial.

**Table S4: Diagnosis and procedure codes used to identify event costs**

| <b>Event type</b>                    | <b>ICD-9 Code or CPT/HCPCS Code</b>                             |
|--------------------------------------|-----------------------------------------------------------------|
| <i>CVD Event</i>                     | <i>AHRQ HCUP<sup>17</sup></i>                                   |
| UA                                   | 411.1, 413.X                                                    |
| MI                                   | 410.X0, 410.X1                                                  |
| HF                                   | 428.XX                                                          |
| Stroke                               | 430, 431, 432.X, 433.X , 434.X, 435.X, 436, 437.X               |
| Sudden cardiac arrest                | 427.5                                                           |
| <i>SAEs</i>                          | <i>AHRQ HCUP<sup>17</sup></i>                                   |
| Hypotension                          | 458.0, 458.29, 458.8, 458.9                                     |
| Syncope                              | 780.2                                                           |
| Bradycardia                          | 427.81, 427.89                                                  |
| Electrolyte abnormality              | 791.9, 276                                                      |
| AKI                                  | 584, 586                                                        |
| <i>Monitoring costs</i>              | <i>CMS physician or laboratory fee schedule<sup>12,13</sup></i> |
| Hypertension management office visit | 99214                                                           |
| Electrolyte monitoring               | 80048                                                           |

AHRQ – Agency for Healthcare Research and Quality, AKI – acute kidney injury, CMS – Centers for Medicare and Medicaid Services, CPT – current procedural terminology, CVD – cardiovascular disease, HCPCS – healthcare common procedure coding system, HCUP – healthcare cost

and utilization project, HF- heart failure, ICD-9 – International Classification of Diseases 9<sup>th</sup> revision, MI – myocardial infarction, SAE – serious adverse event, UA – unstable angina.

**Table S5: Assumptions for alternate scenario analyses not related to medication adherence**

| #                                | Scenario                                                                                                               | Base-case assumption                                                                                                                                                                                                        | Alternate scenario                                                                                                                                                                                                         |
|----------------------------------|------------------------------------------------------------------------------------------------------------------------|-----------------------------------------------------------------------------------------------------------------------------------------------------------------------------------------------------------------------------|----------------------------------------------------------------------------------------------------------------------------------------------------------------------------------------------------------------------------|
| <b>Generalizability</b>          |                                                                                                                        |                                                                                                                                                                                                                             |                                                                                                                                                                                                                            |
| 11                               | SPRINT-eligible general U.S. population (based on the U.S. National Health and Nutrition Examination Survey [NHANES]). | <ul style="list-style-type: none"> <li>Model populated using the characteristics of the SPRINT trial cohort.</li> </ul>                                                                                                     | <ul style="list-style-type: none"> <li>Model populated using the characteristics of the population sampled by the NHANES 2007-2012 and meeting the SPRINT-eligibility criteria (from Bress et al.<sup>38</sup>)</li> </ul> |
| <b>Alternate Utility Sources</b> |                                                                                                                        |                                                                                                                                                                                                                             |                                                                                                                                                                                                                            |
| 12                               | HTN utility + median utilities                                                                                         | <ul style="list-style-type: none"> <li>No disutility for HTN</li> <li>Mean utility values used for other comorbidities</li> </ul>                                                                                           | <ul style="list-style-type: none"> <li>Median utilities used, including median utility for HTN</li> <li>Based on Sullivan et al.<sup>21</sup></li> </ul>                                                                   |
| 13                               | Median utilities                                                                                                       | <ul style="list-style-type: none"> <li>Mean utility values used for other comorbidities</li> </ul>                                                                                                                          | <ul style="list-style-type: none"> <li>Median utility values used for other comorbidities, but utility for HTN excluded</li> <li>Based on Sullivan et al.<sup>21</sup></li> </ul>                                          |
| 14                               | Health related quality of life for patients with hypertension, but no CVD diagnosis utility observed in SPRINT.        | <ul style="list-style-type: none"> <li>Health state-specific utility estimates derived from Sullivan et al. but with utility of hypertension, but no CVD equal to 1.0 (asymptomatic/no disability).<sup>21</sup></li> </ul> | Utility estimates for hypertension but no CVD derived from mean EQ-5D estimates derived from SPRINT.                                                                                                                       |
| 15                               | Alternate Utility Estimates                                                                                            | <ul style="list-style-type: none"> <li>Utility estimates derived from Sullivan et al.<sup>21</sup></li> </ul>                                                                                                               | Utility estimates derived from other literature sources. <sup>39-41</sup>                                                                                                                                                  |
| 16                               | Alternate No prior CVD (i.e., hypertension) Utility                                                                    | <ul style="list-style-type: none"> <li>Utility estimates derived from Sullivan et al. and utility of no CVD (i.e., hypertension alone) was assumed to be 1.000.<sup>21</sup></li> </ul>                                     | Multiple regression adjusted utility estimate of no CVD (i.e., hypertension alone) was 0.975. <sup>21</sup>                                                                                                                |

**Pill-taking disutility**

| #                                                   | Scenario                                                                          | Base-case assumption                                                                                                                                                                                                    | Alternate scenario                                                                                                                                                                                                                           |
|-----------------------------------------------------|-----------------------------------------------------------------------------------|-------------------------------------------------------------------------------------------------------------------------------------------------------------------------------------------------------------------------|----------------------------------------------------------------------------------------------------------------------------------------------------------------------------------------------------------------------------------------------|
| 17                                                  | Increased pill-taking disutility with increased number of medications prescribed. | <ul style="list-style-type: none"> <li>No disutility for taking medications was included.</li> </ul>                                                                                                                    | Additive per medication utility penalty of 0.002 based on the method reported by Hutchins et al. <sup>42</sup>                                                                                                                               |
| <b>Assessing the impact of minor adverse events</b> |                                                                                   |                                                                                                                                                                                                                         |                                                                                                                                                                                                                                              |
| 18                                                  | Minor medication-related adverse events                                           | <ul style="list-style-type: none"> <li>Minor adverse events were not included.</li> </ul>                                                                                                                               | <ul style="list-style-type: none"> <li>Added the risk of and disutility for experiencing symptoms due to minor adverse events.<sup>43,44</sup> No costs to the payer were assumed to incur for minor adverse events.</li> </ul>              |
| <b>Antihypertensive medication cost scenarios</b>   |                                                                                   |                                                                                                                                                                                                                         |                                                                                                                                                                                                                                              |
| 19                                                  | NADAC Drug Costs                                                                  | <ul style="list-style-type: none"> <li>Drug costs were derived from Red Book.</li> </ul>                                                                                                                                | Used drug costs based on the National Average Drug Acquisition Cost (NADAC).                                                                                                                                                                 |
| <b>Serious adverse event Threshold Analyses</b>     |                                                                                   |                                                                                                                                                                                                                         |                                                                                                                                                                                                                                              |
| 20                                                  | Threshold analysis of SAEs in the post-trial period                               | <ul style="list-style-type: none"> <li>For adherent patients, the risk of SAEs was the same as observed in SPRINT. For non-adherent patients, the risk was the same as the standard treatment arm in SPRINT.</li> </ul> | <ul style="list-style-type: none"> <li>The risk of SAEs in the post-trial period was increased until intensive treatment arm was no longer cost-effective (i.e., the ICER was &gt;\$50,000/QALY gained).</li> </ul>                          |
| 21                                                  | Threshold analysis of intensive SAE risk                                          | <ul style="list-style-type: none"> <li>For adherent patients, the risk of SAEs was the same as observed in SPRINT. For non-adherent patients, the risk was the same as the standard treatment arm in SPRINT.</li> </ul> | <ul style="list-style-type: none"> <li>The HR for the risk of SAEs in the intensive SBP treatment arm was increased until the intensive treatment arm was no longer cost-effective (i.e., the ICER was &gt;\$50,000/QALY gained).</li> </ul> |

| #                                              | Scenario                                                                                  | Base-case assumption                                                                                                                                        | Alternate scenario                                                                                                                                                                                                                                                                                                                                                                                                                                                                                                                                                                                                                               |
|------------------------------------------------|-------------------------------------------------------------------------------------------|-------------------------------------------------------------------------------------------------------------------------------------------------------------|--------------------------------------------------------------------------------------------------------------------------------------------------------------------------------------------------------------------------------------------------------------------------------------------------------------------------------------------------------------------------------------------------------------------------------------------------------------------------------------------------------------------------------------------------------------------------------------------------------------------------------------------------|
| <b>Modifying CVD Risk Prediction Scenarios</b> |                                                                                           |                                                                                                                                                             |                                                                                                                                                                                                                                                                                                                                                                                                                                                                                                                                                                                                                                                  |
| 22                                             | Decreased Pooled Cohort Equation Risk                                                     | <ul style="list-style-type: none"> <li>Unaltered Pooled Cohort Risk Equations used to estimate the risk of a CVD event in non-adherent patients.</li> </ul> | <ul style="list-style-type: none"> <li>A pooled, weighted observed-to-predicted ratio of CVD events in high-risk patients was derived from large cohort studies performed in the US.<sup>45</sup> This was applied to the estimated Pooled Cohort Risk of CVD events resulting in an approximate 36% reduction of risk.</li> </ul>                                                                                                                                                                                                                                                                                                               |
| 23                                             | Framingham Recurrent Coronary Heart Disease Equation used to predict recurrent CVD events | <ul style="list-style-type: none"> <li>Pooled Cohort Risk Equations used to estimate the risk of recurrent CVD events.</li> </ul>                           | <ul style="list-style-type: none"> <li>The Framingham Recurrent Coronary Heart Disease Equation<sup>46</sup> was used to predict the risk of recurrent coronary heart disease events (includes mostly hospitalized events consisting of myocardial infarction, coronary insufficiency, angina pectoris, and sudden and non-sudden coronary death in patients with a history of events).</li> </ul>                                                                                                                                                                                                                                               |
| <b>Office and laboratory visit scenarios</b>   |                                                                                           |                                                                                                                                                             |                                                                                                                                                                                                                                                                                                                                                                                                                                                                                                                                                                                                                                                  |
| 24 to 27                                       | Number of office visits                                                                   | <ul style="list-style-type: none"> <li>Intensive vs. standard treatment, visits per year: 4 vs. 3 office, 2 vs. 1 laboratory</li> </ul>                     | <ul style="list-style-type: none"> <li>Intensive vs. standard treatment, visits per year:               <ol style="list-style-type: none"> <li>24. 4 vs. 2 office, 2 vs. 1 laboratory</li> <li>25. First 5 years – 4 vs. 2 office and 2 vs. 1 laboratory, both after 5 years – 2 office and 1 laboratory</li> <li>26. First year – 4 vs. 2 office and 2 vs. 1 laboratory, both after first year – 2 office and 1 laboratory</li> <li>27. Both first 5 years – 4 office and 2 laboratory, after 5 years when adherent – 4 vs. 2 office and 2 vs. 1 laboratory, after 5 years when non-adherent – 2 office and 1 laboratory</li> </ol> </li> </ul> |
| <b>Other Scenario Analyses</b>                 |                                                                                           |                                                                                                                                                             |                                                                                                                                                                                                                                                                                                                                                                                                                                                                                                                                                                                                                                                  |
| 28                                             | Pooled cohort equation for CVD risk throughout                                            | <ul style="list-style-type: none"> <li>CVD risk based on SPRINT results during the first 5 years</li> </ul>                                                 | <ul style="list-style-type: none"> <li>CVD risk based on Pooled cohort equation over entire model time horizon, including first 5 years<sup>33</sup></li> </ul>                                                                                                                                                                                                                                                                                                                                                                                                                                                                                  |



| #  | Scenario                                                                                                    | Base-case assumption                                                                                                                                      | Alternate scenario                                                                                                                                                           |
|----|-------------------------------------------------------------------------------------------------------------|-----------------------------------------------------------------------------------------------------------------------------------------------------------|------------------------------------------------------------------------------------------------------------------------------------------------------------------------------|
| 29 | Standard goal treatment effects for everyone after 5 years regardless of adherence                          | <ul style="list-style-type: none"> <li>Patients persist on treatment goal after the first 5 years</li> </ul>                                              | <ul style="list-style-type: none"> <li>All patients return to standard goal after first 5 years</li> </ul>                                                                   |
| 30 | CDC non-CVD mortality throughout                                                                            | <ul style="list-style-type: none"> <li>Non-CVD mortality is based on SPRINT results in first 5 years, followed by CDC life-tables<sup>34</sup></li> </ul> | <ul style="list-style-type: none"> <li>Non-CVD mortality is based on CDC life-tables over entire model time horizon, including first 5 years<sup>34</sup></li> </ul>         |
| 31 | Alternate CDC non-CVD mortality                                                                             | <ul style="list-style-type: none"> <li>CDC mortality excluding major cardiovascular disease deaths<sup>34</sup></li> </ul>                                | <ul style="list-style-type: none"> <li>CDC mortality excluding hypertensive heart diseases<sup>34</sup></li> </ul>                                                           |
| 32 | Approximation of Richman et al. <sup>47</sup>                                                               | <ul style="list-style-type: none"> <li>See base-case description in Table S2</li> </ul>                                                                   | <ul style="list-style-type: none"> <li>HTN utility included, alternate non-CVD costs, and lifetime in-trial adherence and treatment effects</li> </ul>                       |
| 33 | Alternate mortality after non-fatal CVD event using Peeters et al (base-case). <sup>48</sup>                | <ul style="list-style-type: none"> <li>CDC non-CVD mortality was the same for those with and without cardiovascular disease</li> </ul>                    | <ul style="list-style-type: none"> <li>Non-CVD mortality specific to those with and without CVD from Peeters et al for the base-case.<sup>48</sup></li> </ul>                |
| 34 | Alternate mortality after non-fatal CVD event using Peeters et al (worst-case). <sup>48</sup>               | <ul style="list-style-type: none"> <li>CDC non-CVD mortality was the same for those with and without cardiovascular disease</li> </ul>                    | <ul style="list-style-type: none"> <li>Non-CVD mortality specific to those with and without CVD from Peeters et al for the worst-case.<sup>48</sup></li> </ul>               |
| 35 | Alternate mortality after non-fatal CVD event using Peeters et al (best-case until 15 years). <sup>48</sup> | <ul style="list-style-type: none"> <li>CDC non-CVD mortality was the same for those with and without cardiovascular disease</li> </ul>                    | <ul style="list-style-type: none"> <li>Non-CVD mortality specific to those with and without CVD from Peeters et al for the best-case until 15 years.<sup>48</sup></li> </ul> |
| 36 | Alternate mortality after non-fatal CVD event using Peeters et al (best-case). <sup>48</sup>                | <ul style="list-style-type: none"> <li>CDC non-CVD mortality was the same for those with and without cardiovascular disease</li> </ul>                    | <ul style="list-style-type: none"> <li>Non-CVD mortality specific to those with and without CVD from Peeters et al for the best-case.<sup>48</sup></li> </ul>                |

CDC – Centers for Disease Control and Prevention, CVD – cardiovascular disease, EQ-5D – EuroQol five-dimensions questionnaire, HR – Hazard ratio, HTN – hypertension, ICER – Incremental cost-effectiveness ratio, QALY – Quality-adjusted life-year, SAE – Serious adverse event, SBP – systolic blood pressure, SPRINT – Systolic Blood Pressure Intervention Trial.

**Table S6: Comparison of simulation outputs to published SPRINT results at median SPRINT follow up of 3.3 years**

|                                                           | Intensive (<120 mmHg)<br>Incidence rate (per 1000 person-years) |        |            | Standard (<140 mmHg)<br>Incidence rate (per 1000 person-years) |        |            | Intensive vs. Standard Hazard<br>Ratio (95%CI) |                  |
|-----------------------------------------------------------|-----------------------------------------------------------------|--------|------------|----------------------------------------------------------------|--------|------------|------------------------------------------------|------------------|
|                                                           | Model                                                           | SPRINT | Abs. Diff. | Model                                                          | SPRINT | Abs. Diff. | Model                                          | SPRINT           |
| <i>Primary validation</i>                                 |                                                                 |        |            |                                                                |        |            |                                                |                  |
| First CVD event or CVD death                              | 17.3                                                            | 16.5   | 0.8        | 22.2                                                           | 21.9   | 0.3        | 0.78 (0.70-0.87)                               | 0.75 (0.64-0.89) |
| <i>Secondary validation</i>                               |                                                                 |        |            |                                                                |        |            |                                                |                  |
| CVD events                                                |                                                                 |        |            |                                                                |        |            |                                                |                  |
| Myocardial infarction                                     | 5.7                                                             | 6.5    | 0.8        | 6.4                                                            | 7.8    | 1.4        | 0.88 (0.72-1.08)                               | 0.83 (0.64-1.09) |
| ACS/UA                                                    | 2.1                                                             | 2.7    | 0.6        | 2.2                                                            | 2.7    | 0.5        | 0.99 (0.71-1.39)                               | 1.00 (0.64-1.55) |
| Stroke                                                    | 3.1                                                             | 4.1    | 1.0        | 3.7                                                            | 4.7    | 1.0        | 0.85 (0.65-1.11)                               | 0.89 (0.63-1.25) |
| Heart failure                                             | 3.4                                                             | 4.1    | 0.7        | 5.1                                                            | 6.7    | 1.6        | 0.66 (0.51-0.83)                               | 0.62 (0.45-0.84) |
| CVD death                                                 | 3.0                                                             | 2.5    | 0.5        | 4.8                                                            | 4.3    | 0.5        | 0.62 (0.48-0.80)                               | 0.57 (0.38-0.85) |
| All-cause mortality                                       | 11.0                                                            | 10.3   | 0.7        | 14.4                                                           | 14.0   | 0.7        | 0.77 (0.67-0.88)                               | 0.73 (0.60-0.90) |
| Non-CVD mortality                                         | 7.5                                                             | 7.8    | 0.3        | 9.3                                                            | 9.6    | 0.3        | 0.81 (0.68-0.96)                               | 0.81 (0.64-1.03) |
| SAEs of interest (i.e., only those included in the model) |                                                                 |        |            |                                                                |        |            |                                                |                  |

|                         |      |      |     |     |     |     |                  |                  |
|-------------------------|------|------|-----|-----|-----|-----|------------------|------------------|
| Hypotension             | 9.6  | 10.6 | 1.0 | 4.7 | 6.2 | 1.5 | 2.04 (1.68-2.48) | 1.70 (1.24-2.33) |
| Syncope                 | 9.8  | 10.9 | 1.1 | 6.2 | 7.5 | 0.7 | 1.59 (1.33-1.90) | 1.44 (1.13-1.83) |
| Bradycardia             | 6.5  | 6.8  | 0.3 | 5.0 | 5.6 | 0.6 | 1.32 (1.07-1.62) | 1.25 (0.94-1.67) |
| Electrolyte abnormality | 11.2 | 11.9 | 0.7 | 7.5 | 8.7 | 1.2 | 1.49 (1.27-1.75) | 1.38 (1.10-1.73) |
| AKI                     | 13.0 | 13.8 | 0.8 | 7.1 | 8.1 | 1.0 | 1.83 (1.56-2.15) | 1.71 (1.24-2.35) |

Abs. Diff – Absolute difference, ACS/UA – Acute coronary syndrome/unstable angina, AKI – Acute kidney disease, CI – Confidence interval, CVD – Cardiovascular disease, HF – Heart failure, mmHg – Millimeters of mercury, SAEs – Serious adverse events, SPRINT – Systolic Blood Pressure Intervention Trial.

**Table S7: Lifetime simulated cardiovascular disease events across the four different post-trial period adherence and treatment effect scenarios**

|                                 | Mean Remaining Life Expectancy | Primary Outcome      |                                        | CVD Death            |                                        | All CVD Events or CVD Death |                                        |
|---------------------------------|--------------------------------|----------------------|----------------------------------------|----------------------|----------------------------------------|-----------------------------|----------------------------------------|
|                                 |                                | Cumulative incidence | Incidence Rate (Per 1000 Person-years) | Cumulative incidence | Incidence Rate (Per 1000 Person-years) | Cumulative incidence        | Incidence Rate (Per 1000 Person-years) |
| <i>Base-case</i>                |                                |                      |                                        |                      |                                        |                             |                                        |
| Intensive                       | 18.99                          | 41.69%               | 27.67                                  | 10.79%               | 5.68                                   | 59.92%                      | 31.49                                  |
| Standard                        | 18.53                          | 43.39%               | 29.84                                  | 12.69%               | 6.85                                   | 62.04%                      | 33.49                                  |
| <i>Worst-case</i>               |                                |                      |                                        |                      |                                        |                             |                                        |
| Intensive                       | 18.86                          | 46.46%               | 32.02                                  | 11.91%               | 6.31                                   | 67.89%                      | 35.99                                  |
| Standard                        | 18.47                          | 47.05%               | 33.23                                  | 13.65%               | 7.39                                   | 68.40%                      | 37.02                                  |
| <i>Best-case until 15 years</i> |                                |                      |                                        |                      |                                        |                             |                                        |
| Intensive                       | 19.19                          | 37.68%               | 24.16                                  | 9.30%                | 4.85                                   | 51.94%                      | 27.07                                  |
| Standard                        | 18.65                          | 41.66%               | 28.28                                  | 11.80%               | 6.33                                   | 57.67%                      | 30.92                                  |
| <i>Best-case</i>                |                                |                      |                                        |                      |                                        |                             |                                        |
| Intensive                       | 19.57                          | 31.27%               | 19.09                                  | 5.93%                | 3.03                                   | 38.01%                      | 19.42                                  |
| Standard                        | 19.03                          | 40.56%               | 26.56                                  | 10.57%               | 5.56                                   | 52.53%                      | 27.61                                  |

The four different post-trial adherence and treatment effect scenarios are shown: base-case (i.e., decay in adherence and treatment effects after five years until non-adherent and no treatment effects at 15 years), non-adherence and no treatment effects after five years, in-trial adherence and treatment effects persists for 15 years, and lifetime in-trial adherence and treatment effects.

CVD – cardiovascular disease

**Table S8: Direct medical costs (2017 USD), reported by type, from probabilistic analyses**

|                                 | Mean Intensive | Mean Standard | Incremental | 95% Uncertainty Interval |             |
|---------------------------------|----------------|---------------|-------------|--------------------------|-------------|
|                                 |                |               |             | Lower Limit              | Upper Limit |
| <i>Base-case</i>                |                |               |             |                          |             |
| Total                           | \$284,637      | \$271,841     | \$12,796    | -\$872                   | \$26,551    |
| CVD Event                       | \$5,414        | \$5,728       | -\$314      | -\$2,749                 | \$2,024     |
| SAE                             | \$5,319        | \$3,596       | \$1,723     | -\$437                   | \$4,484     |
| Non-CVD Medical Costs           | \$208,803      | \$201,702     | \$7,102     | \$2,248                  | \$14,060    |
| Chronic CVD                     | \$52,395       | \$52,432      | -\$37       | -\$13,326                | \$13,937    |
| Treatment*                      | \$12,704       | \$8,382       | \$4,322     | \$2,799                  | \$5,851     |
| <i>Worst-case</i>               |                |               |             |                          |             |
| Total                           | \$283,401      | \$270,965     | \$12,436    | -\$2,148                 | \$28,091    |
| CVD Event                       | \$6,184        | \$6,317       | -\$133      | -\$2,915                 | \$2,771     |
| SAE                             | \$4,615        | \$3,603       | \$1,012     | -\$1,052                 | \$3,327     |
| Non-CVD Medical Costs           | \$207,358      | \$200,034     | \$7,325     | \$2,492                  | \$14,169    |
| Chronic CVD                     | \$56,523       | \$54,920      | \$1,603     | -\$12,767                | \$17,746    |
| Treatment*                      | \$8,720        | \$6,091       | \$2,629     | \$2,024                  | \$3,285     |
| <i>Best-case until 15 years</i> |                |               |             |                          |             |
| Total                           | \$286,161      | \$274,163     | \$11,998    | -\$862                   | \$25,365    |
| CVD Event                       | \$4,685        | \$5,313       | -\$628      | -\$2,722                 | \$1,305     |
| SAE                             | \$5,826        | \$3,497       | \$2,329     | \$156                    | \$5,470     |
| Non-CVD Medical Costs           | \$210,441      | \$203,233     | \$7,208     | \$2,194                  | \$14,484    |
| Chronic CVD                     | \$49,435       | \$51,148      | -\$1,713    | -\$14,574                | \$10,869    |
| Treatment*                      | \$15,774       | \$10,972      | \$4,802     | \$3,076                  | \$6,519     |
| <i>Best-case</i>                |                |               |             |                          |             |

|                       | Mean Intensive | Mean Standard | Incremental | 95% Uncertainty Interval |             |
|-----------------------|----------------|---------------|-------------|--------------------------|-------------|
|                       |                |               |             | Lower Limit              | Upper Limit |
| Total                 | \$285,909      | \$274,146     | \$11,763    | -\$5,386                 | \$29,232    |
| CVD Event             | \$3,776        | \$5,074       | -\$1,297    | -\$4,620                 | \$1,641     |
| SAE                   | \$5,418        | \$3,394       | \$2,025     | -\$135                   | \$4,752     |
| Non-CVD Medical Costs | \$214,631      | \$204,392     | \$10,239    | \$4,440                  | \$17,879    |
| Chronic CVD           | \$46,390       | \$50,551      | -\$4,161    | -\$20,879                | \$11,641    |
| Treatment*            | \$15,693       | \$10,736      | \$4,957     | \$3,246                  | \$6,732     |

\*Treatment costs included antihypertensive medications, office visits, and laboratory visits

CVD – Cardiovascular disease, SAE – Serious adverse event, USD – United States dollars

**Table S9: Direct medical costs, effectiveness, and incremental cost-effectiveness results of probabilistic analyses in subgroups**

|                        | Mean Total Costs (2017 USD) | Incremental Costs (95% UI) | Mean Remaining Lifetime QALYs | Incremental QALYs (95% UI) | ICER (Cost/QALY gained) | Probability Cost-effective |             |             |
|------------------------|-----------------------------|----------------------------|-------------------------------|----------------------------|-------------------------|----------------------------|-------------|-------------|
|                        |                             |                            |                               |                            |                         | \$50k/QALY                 | \$100k/QALY | \$150k/QALY |
| <i>Previous CKD</i>    |                             |                            |                               |                            |                         |                            |             |             |
| Intensive              | \$325,224                   | \$11,462                   | 12.03                         | 0.30                       | \$38,601                | 62%                        | 81%         | 86%         |
| Standard               | \$313,763                   | (-\$4,884, \$30,831)       | 11.73                         | (-0.11, 0.75)              | -                       | -                          | -           | -           |
| <i>No Previous CKD</i> |                             |                            |                               |                            |                         |                            |             |             |
| Intensive              | \$270,435                   | \$13,895                   | 12.59                         | 0.25                       | \$56,420                | 45%                        | 75%         | 83%         |
| Standard               | \$256,540                   | (\$489, \$27,944)          | 12.35                         | (-0.07, 0.56)              | -                       | -                          | -           | -           |
| <i>Age &lt;75</i>      |                             |                            |                               |                            |                         |                            |             |             |
| Intensive              | \$292,063                   | \$13,720                   | 13.74                         | 0.27                       | \$50,000                | 51%                        | 78%         | 86%         |
| Standard               | \$278,343                   | (-\$475, \$29,037)         | 13.46                         | (-0.07, 0.63)              | -                       | -                          | -           | -           |
| <i>Age ≥75</i>         |                             |                            |                               |                            |                         |                            |             |             |
| Intensive              | \$266,155                   | \$7,656                    | 9.11                          | 0.30                       | \$25,697                | 79%                        | 93%         | 96%         |
| Standard               | \$258,498                   | (-\$4,687, \$19,627)       | 8.81                          | (0.02, 0.60)               | -                       | -                          | -           | -           |
| <i>Female</i>          |                             |                            |                               |                            |                         |                            |             |             |
| Intensive              | \$327,854                   | \$14,189                   | 13.06                         | 0.19                       | \$76,606                | 32%                        | 60%         | 70%         |
| Standard               | \$313,664                   | (\$1,532, \$28,677)        | 12.87                         | (-0.17, 0.55)              | -                       | -                          | -           | -           |
| <i>Male</i>            |                             |                            |                               |                            |                         |                            |             |             |
| Intensive              | \$260,596                   | \$11,756                   | 12.11                         | 0.29                       | \$40,199                | 61%                        | 83%         | 89%         |
| Standard               | \$248,841                   | (-\$1,840, \$26,907)       | 11.81                         | (-0.04, 0.65)              | -                       | -                          | -           | -           |

|                        | Mean Total Costs (2017 USD) | Incremental Costs (95% UI) | Mean Remaining Lifetime QALYs | Incremental QALYs (95% UI) | ICER (Cost/QALY gained) | Probability Cost-effective |             |             |
|------------------------|-----------------------------|----------------------------|-------------------------------|----------------------------|-------------------------|----------------------------|-------------|-------------|
|                        |                             |                            |                               |                            |                         | \$50k/QALY                 | \$100k/QALY | \$150k/QALY |
| <i>Black</i>           |                             |                            |                               |                            |                         |                            |             |             |
| Intensive              | \$282,555                   | \$12,262                   | 12.65                         | 0.22                       | \$55,287                | 46%                        | 71%         | 79%         |
| Standard               | \$270,294                   | (\$436, \$25,750)          | 12.43                         | (-0.11, 0.58)              | -                       | -                          | -           | -           |
| <i>Non-Black</i>       |                             |                            |                               |                            |                         |                            |             |             |
| Intensive              | \$285,792                   | \$13,502                   | 12.36                         | 0.30                       | \$44,493                | 57%                        | 84%         | 89%         |
| Standard               | \$272,291                   | (\$242, \$29,049)          | 12.06                         | (-0.05, 0.64)              | -                       | -                          | -           | -           |
| <i>Previous CVD</i>    |                             |                            |                               |                            |                         |                            |             |             |
| Intensive              | \$393,274                   | \$17,160                   | 9.38                          | 0.24                       | \$71,740                | 41%                        | 60%         | 70%         |
| Standard               | \$376,114                   | (\$15,939, \$55,881)       | 9.14                          | (-0.16, 0.72)              | -                       | -                          | -           | -           |
| <i>No Previous CVD</i> |                             |                            |                               |                            |                         |                            |             |             |
| intensive              | \$282,740                   | \$12,490                   | 12.56                         | 0.25                       | \$49,691                | 51%                        | 79%         | 86%         |
| Standard               | \$270,250                   | (\$501, \$26,166)          | 12.31                         | (-0.03, 0.54)              | -                       | -                          | -           | -           |

CKD – Chronic kidney disease, CVD – Cardiovascular disease, ICER – Incremental cost-effectiveness ratio, QALYs – Quality-adjusted life-years, UI – Uncertainty interval, USD – United States dollars.



**Table S10. Non-probabilistic analyses of costs, effectiveness, and incremental cost-effectiveness results in scenario analyses**

| #                                     | Scenario                                        | Mean Costs<br>(2017 USD) | Mean QALYs | ICER (Cost/<br>QALY<br>gained) |
|---------------------------------------|-------------------------------------------------|--------------------------|------------|--------------------------------|
| <b>Main Scenarios</b>                 |                                                 |                          |            |                                |
| 1                                     | Base-case                                       |                          |            |                                |
|                                       | Intensive                                       | \$288,926                | 12.34      | \$44,272                       |
|                                       | Standard                                        | \$275,595                | 12.04      | -                              |
| 2                                     | Worst-case                                      |                          |            |                                |
|                                       | Intensive                                       | \$287,799                | 12.19      | \$45,619                       |
|                                       | Standard                                        | \$276,757                | 11.95      | -                              |
| 3                                     | Best-case until 15<br>years                     |                          |            |                                |
|                                       | Intensive                                       | \$289,320                | 12.52      | \$33,731                       |
|                                       | Standard                                        | \$276,682                | 12.14      | -                              |
| 4                                     | Best-case                                       |                          |            |                                |
|                                       | Intensive                                       | \$286,904                | 12.75      | \$24,143                       |
|                                       | Standard                                        | \$277,022                | 12.34      | -                              |
| <b>Medication Adherence Scenarios</b> |                                                 |                          |            |                                |
| 5                                     | In-trial non-adherence                          |                          |            |                                |
|                                       | Intensive                                       | \$287,008                | 12.25      | \$49,622                       |
|                                       | Standard                                        | \$274,079                | 11.98      | -                              |
| 6                                     | In trial discontinuation and non-adherence      |                          |            |                                |
|                                       | Intensive                                       | \$286,334                | 12.24      | \$46,621                       |
|                                       | Standard                                        | \$274,464                | 11.98      | -                              |
| 7                                     | Alternate adherence estimates (post-trial only) |                          |            |                                |

| #                                | Scenario                                                                                                                         | Mean Costs<br>(2017 USD) | Mean QALYs | ICER (Cost/<br>QALY<br>gained) |
|----------------------------------|----------------------------------------------------------------------------------------------------------------------------------|--------------------------|------------|--------------------------------|
|                                  | Intensive                                                                                                                        | \$288,986                | 12.29      | \$44,738                       |
|                                  | Standard                                                                                                                         | \$276,438                | 12.01      | -                              |
| 8                                | Permanent discontinuation post-trial period only                                                                                 |                          |            |                                |
|                                  | Intensive                                                                                                                        | \$285,956                | 12.33      | \$38,178                       |
|                                  | Standard                                                                                                                         | \$273,968                | 12.01      | -                              |
| 9                                | Moderate post-trial medication adherence                                                                                         |                          |            |                                |
|                                  | Intensive                                                                                                                        | \$288,328                | 12.36      | \$44,462                       |
|                                  | Standard                                                                                                                         | \$275,010                | 12.06      | -                              |
| 10                               | SPRINT observed adherence estimates                                                                                              |                          |            |                                |
|                                  | Intensive                                                                                                                        | \$288,873                | 12.35      | \$42,281                       |
|                                  | Standard                                                                                                                         | \$276,020                | 12.04      | -                              |
| <b>Generalizability</b>          |                                                                                                                                  |                          |            |                                |
| 11                               | SPRINT-eligible general U.S. population (based on NHANES)                                                                        |                          |            |                                |
|                                  | Intensive                                                                                                                        | \$281,198                | 12.32      | \$46,113                       |
|                                  | Standard                                                                                                                         | \$266,960                | 12.01      | -                              |
| <b>Alternate Utility Sources</b> |                                                                                                                                  |                          |            |                                |
| 12                               | HTN utility + median utilities                                                                                                   |                          |            |                                |
|                                  | Intensive                                                                                                                        | \$288,926                | 10.98      | \$52,800                       |
|                                  | Standard                                                                                                                         | \$275,595                | 10.72      | -                              |
| 13                               | Median utilities                                                                                                                 |                          |            |                                |
|                                  | Intensive                                                                                                                        | \$288,926                | 12.69      | \$43,946                       |
|                                  | Standard                                                                                                                         | \$275,595                | 12.38      | -                              |
| 14                               | Health related quality of life for patients with hypertension, but no CVD diagnosis, using utility observed in SPRINT with EQ-5D |                          |            |                                |
|                                  | Intensive                                                                                                                        | \$288,926                | 10.81      | \$52,176                       |

| #                                                   | Scenario                                                                                  | Mean Costs<br>(2017 USD) | Mean QALYs                      | ICER (Cost/ QALY<br>gained) |
|-----------------------------------------------------|-------------------------------------------------------------------------------------------|--------------------------|---------------------------------|-----------------------------|
|                                                     | Standard                                                                                  | \$275,595                | 10.55                           | -                           |
| 15                                                  | Alternate utility estimates                                                               |                          |                                 |                             |
|                                                     | Intensive                                                                                 | \$288,926                | 12.50                           | \$41,666                    |
|                                                     | Standard                                                                                  | \$275,595                | 12.18                           | -                           |
| 16                                                  | Alternate no prior CVD (i.e., hypertension) utility                                       |                          |                                 |                             |
|                                                     | Intensive                                                                                 | \$288,926                | 12.11                           | \$45,312                    |
|                                                     | Standard                                                                                  | \$275,595                | 11.81                           | -                           |
| <b>Pill-taking disutility</b>                       |                                                                                           |                          |                                 |                             |
| 17                                                  | Increased pill-taking disutility with increased number of medications prescribed          |                          |                                 |                             |
|                                                     | Intensive                                                                                 | \$288,926                | 12.24                           | \$49,308                    |
|                                                     | Standard                                                                                  | \$275,595                | 11.97                           | -                           |
| <b>Assessing the impact of minor adverse events</b> |                                                                                           |                          |                                 |                             |
| 18                                                  | Minor adverse events                                                                      |                          |                                 |                             |
|                                                     | Intensive                                                                                 | \$288,926                | 12.32                           | \$44,744                    |
|                                                     | Standard                                                                                  | \$275,595                | 12.02                           | -                           |
| <b>Antihypertensive medication cost scenarios</b>   |                                                                                           |                          |                                 |                             |
| 19                                                  | NADAC drug costs                                                                          |                          |                                 |                             |
|                                                     | Intensive                                                                                 | \$285,999                | 12.34                           | \$40,162                    |
|                                                     | Standard                                                                                  | \$273,906                | 12.04                           | -                           |
| <b>Serious adverse event threshold analyses</b>     |                                                                                           |                          |                                 |                             |
| 20                                                  | Threshold analysis of SAEs in the post-trial period                                       |                          | Results presented in Figure S12 |                             |
| 21                                                  | Threshold analysis of intensive SAE risk                                                  |                          | Results Presented in Figure S13 |                             |
| <b>Modifying CVD Risk Prediction Scenarios</b>      |                                                                                           |                          |                                 |                             |
| 22                                                  | Decreased Pooled Cohort risk equations                                                    |                          |                                 |                             |
|                                                     | Intensive                                                                                 | \$284,184                | 12.59                           | \$37,919                    |
|                                                     | Standard                                                                                  | \$272,438                | 12.28                           | -                           |
| 23                                                  | Framingham Recurrent Coronary Heart Disease Equation used to predict recurrent CVD events |                          |                                 |                             |

| #                                                                                                          | Scenario                                                                                                                                                                         | Mean Costs<br>(2017 USD) | Mean QALYs | ICER (Cost/ QALY<br>gained) |
|------------------------------------------------------------------------------------------------------------|----------------------------------------------------------------------------------------------------------------------------------------------------------------------------------|--------------------------|------------|-----------------------------|
|                                                                                                            | Intensive                                                                                                                                                                        | \$289,626                | 12.36      | \$43,970                    |
|                                                                                                            | Standard                                                                                                                                                                         | \$275,520                | 12.04      | -                           |
| <b>Number of office and laboratory visit scenarios (Intensive vs. standard treatment, visits per year)</b> |                                                                                                                                                                                  |                          |            |                             |
| 24                                                                                                         | 4 vs. 2 office, 2 vs. 1 laboratory                                                                                                                                               |                          |            |                             |
|                                                                                                            | Intensive                                                                                                                                                                        | \$288,926                | 12.34      | \$49,158                    |
|                                                                                                            | Standard                                                                                                                                                                         | \$274,123                | 12.04      | -                           |
| 25                                                                                                         | First year – 4 vs. 2 office and 2 vs. 1 laboratory, both after first year – 2 office and 1 laboratory                                                                            |                          |            |                             |
|                                                                                                            | Intensive                                                                                                                                                                        | \$286,755                | 12.34      | \$41,951                    |
|                                                                                                            | Standard                                                                                                                                                                         | \$274,123                | 12.04      | -                           |
| 26                                                                                                         | First 5 years – 4 vs. 2 office and 2 vs. 1 laboratory, both after 5 years – 2 office and 1 laboratory                                                                            |                          |            |                             |
|                                                                                                            | Intensive                                                                                                                                                                        | \$285,924                | 12.34      | \$39,191                    |
|                                                                                                            | Standard                                                                                                                                                                         | \$274,123                | 12.04      | -                           |
| 27                                                                                                         | Both first 5 years – 4 office and 2 laboratory, after 5 years when adherent – 4 vs. 2 office and 2 vs. 1 laboratory, after 5 years when non-adherent – 2 office and 1 laboratory |                          |            |                             |
|                                                                                                            | Intensive                                                                                                                                                                        | \$287,977                | 12.34      | \$42,510                    |
|                                                                                                            | Standard                                                                                                                                                                         | \$275,177                | 12.04      | -                           |
| <b>Other Scenario Analyses</b>                                                                             |                                                                                                                                                                                  |                          |            |                             |
| 28                                                                                                         | Pooled cohort equation for CVD risk throughout                                                                                                                                   |                          |            |                             |
|                                                                                                            | Intensive                                                                                                                                                                        | \$291,351                | 12.25      | \$75,956                    |
|                                                                                                            | Standard                                                                                                                                                                         | \$277,704                | 12.07      | -                           |
| 29                                                                                                         | Standard goal treatment effects for everyone after 5 years regardless of adherence                                                                                               |                          |            |                             |
|                                                                                                            | Intensive                                                                                                                                                                        | \$286,719                | 12.38      | \$49,916                    |
|                                                                                                            | Standard                                                                                                                                                                         | \$274,517                | 12.13      | -                           |
| 30                                                                                                         | CDC non-CVD mortality throughout                                                                                                                                                 |                          |            |                             |
|                                                                                                            | Intensive                                                                                                                                                                        | \$274,842                | 11.86      | \$51,610                    |
|                                                                                                            | Standard                                                                                                                                                                         | \$264,408                | 11.66      | -                           |
| 31                                                                                                         | Alternate CDC non-CVD mortality                                                                                                                                                  |                          |            |                             |
|                                                                                                            | Intensive                                                                                                                                                                        | \$228,773                | 10.91      | \$39,959                    |

| #  | Scenario                                                                                                    | Mean Costs<br>(2017 USD) | Mean QALYs | ICER (Cost/ QALY<br>gained) |
|----|-------------------------------------------------------------------------------------------------------------|--------------------------|------------|-----------------------------|
|    | Standard                                                                                                    | \$219,353                | 10.68      | -                           |
| 32 | Approximation of Richman et al. <sup>47</sup>                                                               |                          |            |                             |
|    | Intensive                                                                                                   | \$244,709                | 10.64      | \$37,121                    |
|    | Standard                                                                                                    | \$233,037                | 10.32      | -                           |
| 33 | Alternate mortality after non-fatal CVD event using Peeters et al (base-case). <sup>48</sup>                |                          |            |                             |
|    | Intensive                                                                                                   | \$272,145                | 12.11      | \$44,561                    |
|    | Standard                                                                                                    | \$258,937                | 11.82      | -                           |
| 34 | Alternate mortality after non-fatal CVD event using Peeters et al (worst-case). <sup>48</sup>               |                          |            |                             |
|    | Intensive                                                                                                   | \$268,686                | 11.94      | \$44,088                    |
|    | Standard                                                                                                    | \$258,522                | 11.71      | -                           |
| 35 | Alternate mortality after non-fatal CVD event using Peeters et al (best-case until 15 years). <sup>48</sup> |                          |            |                             |
|    | Intensive                                                                                                   | \$274,971                | 12.32      | \$35,818                    |
|    | Standard                                                                                                    | \$261,445                | 11.94      | -                           |
| 36 | Alternate mortality after non-fatal CVD event using Peeters et al (best-case). <sup>48</sup>                |                          |            |                             |
|    | Intensive                                                                                                   | \$276,308                | 12.57      | \$27,321                    |
|    | Standard                                                                                                    | \$264,195                | 12.12      |                             |

Scenarios 20 and 21, the SAE threshold analyses, are presented in Figure S12 and S13 and on page 24 and 25 of text.

CDC – Centers for Disease Control and Prevention, CKD – Chronic kidney disease, CVD – Cardiovascular disease, HTN – Hypertension, ICER – Incremental cost-effectiveness ratio, NADAC – National Average Drug Acquisition Cost, NHANES – U.S. National Health and Nutrition Examination Survey, QALY – quality-adjusted life-year, SAE – Serious adverse event, SPRINT – Systolic Blood Pressure Intervention Trial, USD – United States dollars

**Table S11: Adherence to CHEERS CEA checklist.<sup>49</sup>**

**CHEERS Checklist**

**Items to include when reporting economic evaluations of health interventions**

The **ISPOR CHEERS Task Force Report**, *Consolidated Health Economic Evaluation Reporting Standards (CHEERS)—Explanation and Elaboration: A Report of the ISPOR Health Economic Evaluations Publication Guidelines Good Reporting Practices Task Force*, provides examples and further discussion of the 24-item CHEERS Checklist and the CHEERS Statement. It may be accessed via the *Value in Health* or via the ISPOR Health Economic Evaluation Publication Guidelines – CHEERS: Good Reporting Practices webpage:

<http://www.ispor.org/TaskForces/EconomicPubGuidelines.asp>

| <b>Section/item</b>             | <b>Item No</b> | <b>Recommendation</b>                                                                                                                                                                   | <b>Reported on page #/line #</b> |
|---------------------------------|----------------|-----------------------------------------------------------------------------------------------------------------------------------------------------------------------------------------|----------------------------------|
| <b>Title and abstract</b>       |                |                                                                                                                                                                                         |                                  |
| Title                           | 1              | Identify the study as an economic evaluation or use more specific terms such as “cost-effectiveness analysis”, and describe the interventions compared.                                 | Title page (Page 1)              |
| Abstract                        | 2              | Provide a structured summary of objectives, perspective, setting, methods (including study design and inputs), results (including base case and uncertainty analyses), and conclusions. | Pages 2 & 3                      |
| <b>Introduction</b>             |                |                                                                                                                                                                                         |                                  |
| Background and objectives       | 3              | Provide an explicit statement of the broader context for the study.<br><br>Present the study question and its relevance for health policy or practice decisions.                        | Pages 4                          |
| <b>Methods</b>                  |                |                                                                                                                                                                                         |                                  |
| Target population and subgroups | 4              | Describe characteristics of the base case population and subgroups analysed, including why they were chosen.                                                                            | Pages 5 & 6                      |
| Setting and location            | 5              | State relevant aspects of the system(s) in which the decision(s) need(s) to be made.                                                                                                    | Page 5                           |
| Study perspective               | 6              | Describe the perspective of the study and relate this to the costs being evaluated.                                                                                                     | Page 5                           |
| Comparators                     | 7              | Describe the interventions or strategies being compared and state why they were chosen.                                                                                                 | Pages 5 & 6                      |

| Section/item                                           | Item No | Recommendation                                                                                                                                                                                                                                                                                                                     | Reported on page #/line #                                                 |
|--------------------------------------------------------|---------|------------------------------------------------------------------------------------------------------------------------------------------------------------------------------------------------------------------------------------------------------------------------------------------------------------------------------------|---------------------------------------------------------------------------|
| Time horizon                                           | 8       | State the time horizon(s) over which costs and consequences are being evaluated and say why appropriate.                                                                                                                                                                                                                           | Page 5                                                                    |
| Discount rate                                          | 9       | Report the choice of discount rate(s) used for costs and outcomes and say why appropriate.                                                                                                                                                                                                                                         | Page 7                                                                    |
| Choice of health outcomes                              | 10      | Describe what outcomes were used as the measure(s) of benefit in the evaluation and their relevance for the type of analysis performed.                                                                                                                                                                                            | Pages 5-8 & Table 1                                                       |
| Measurement of effectiveness                           | 11a     | <i>Single study-based estimates:</i> Describe fully the design features of the single effectiveness study and why the single study was a sufficient source of clinical effectiveness data                                                                                                                                          | Not applicable                                                            |
|                                                        | 11b     | <i>Synthesis-based estimates:</i> Describe fully the methods used for identification of included studies and synthesis of clinical effectiveness data.                                                                                                                                                                             | Page 8 & Table 1                                                          |
| Measurement and valuation of preference based outcomes | 12      | If applicable, describe the population and methods used to elicit preferences for outcomes.                                                                                                                                                                                                                                        | Not applicable                                                            |
| Estimating resources and costs                         | 13a     | <i>Single study-based economic evaluation:</i> Describe approaches used to estimate resource use associated with the alternative interventions. Describe primary or secondary research methods for valuing each resource item in terms of its unit cost.<br><br>Describe any adjustments made to approximate to opportunity costs. | Not applicable                                                            |
|                                                        | 13b     | <i>Model-based economic evaluation:</i> Describe approaches and data sources used to estimate resource use associated with model health states. Describe primary or secondary research methods for valuing each resource item in terms of its unit cost. Describe any adjustments made to approximate to opportunity costs.        | Pages 5-8 & Table 1 (Note: indirect and opportunity costs not considered) |
| Currency, price date, and conversion                   | 14      | Report the dates of the estimated resource quantities and unit costs. Describe methods for adjusting estimated unit costs to the year of reported costs if necessary. Describe methods for converting costs into a common currency base and the exchange rate.                                                                     | Page 7-8 & Table 1                                                        |
| Choice of model                                        | 15      | Describe and give reasons for the specific type of decision- analytical model used. Providing a figure to show model structure is strongly recommended.                                                                                                                                                                            | Page 5 & Figure 1                                                         |

| Section/item       | Item No | Recommendation                                                                                                                                                                                                                                                                                                                                        | Reported on page #/line #                                   |
|--------------------|---------|-------------------------------------------------------------------------------------------------------------------------------------------------------------------------------------------------------------------------------------------------------------------------------------------------------------------------------------------------------|-------------------------------------------------------------|
| Assumptions        | 16      | Describe all structural or other assumptions underpinning the decision-analytical model.                                                                                                                                                                                                                                                              | Pages 5-7, Figure 1, & Supplement Pages 4-12 & Tables S2-S4 |
| Analytical methods | 17      | Describe all analytical methods supporting the evaluation. This could include methods for dealing with skewed, missing, or censored data; extrapolation methods; methods for pooling data; approaches to validate or make adjustments (such as half cycle corrections) to a model; and methods for handling population heterogeneity and uncertainty. | Pages 5-9 & Supplement pages 4-12                           |

## Results

|                                |     |                                                                                                                                                                                                                                                                             |                                                                                   |
|--------------------------------|-----|-----------------------------------------------------------------------------------------------------------------------------------------------------------------------------------------------------------------------------------------------------------------------------|-----------------------------------------------------------------------------------|
| Study parameters               | 18  | Report the values, ranges, references, and, if used, probability distributions for all parameters. Report reasons or sources for distributions used to represent uncertainty where appropriate. Providing a table to show the input values is strongly recommended.         | Table 1 & Table S1                                                                |
| Incremental costs and outcomes | 19  | For each intervention, report mean values for the main categories of estimated costs and outcomes of interest, as well as mean differences between the comparator groups. If applicable, report incremental cost-effectiveness ratios.                                      | Tables 1 & 2, Figure 2 & 3                                                        |
| Characterising uncertainty     | 20a | <i>Single study-based economic evaluation:</i> Describe the effects of sampling uncertainty for the estimated incremental cost and incremental effectiveness parameters, together with the impact of methodological assumptions (such as discount rate, study perspective). | Not applicable                                                                    |
|                                | 20b | <i>Model-based economic evaluation:</i> Describe the effects on the results of uncertainty for all input parameters, and uncertainty related to the structure of the model and assumptions.                                                                                 | Pages 10-12, Table 2, Figure 2 & 3, & Tables S7, S8, S10 & Figures S5, S6, S9-S13 |
| Characterising heterogeneity   | 21  | If applicable, report differences in costs, outcomes, or cost-effectiveness that can be explained by variations between subgroups of patients with different baseline characteristics or other observed variability in effects that are not reducible by more information.  | Table S9                                                                          |

## Discussion

|                                                                      |    |                                                                                                                                                                                                   |             |
|----------------------------------------------------------------------|----|---------------------------------------------------------------------------------------------------------------------------------------------------------------------------------------------------|-------------|
| Study findings, limitations, generalisability, and current knowledge | 22 | Summarise key study findings and describe how they support the conclusions reached. Discuss limitations and the generalisability of the findings and how the findings fit with current knowledge. | Pages 12-16 |
|----------------------------------------------------------------------|----|---------------------------------------------------------------------------------------------------------------------------------------------------------------------------------------------------|-------------|



| <b>Section/item</b>   | <b>Item No</b> | <b>Recommendation</b>                                                                                                                                                                                                                                    | <b>Reported on page #/line #</b> |
|-----------------------|----------------|----------------------------------------------------------------------------------------------------------------------------------------------------------------------------------------------------------------------------------------------------------|----------------------------------|
| <b>Other</b>          |                |                                                                                                                                                                                                                                                          |                                  |
| Source of funding     | 23             | Describe how the study was funded and the role of the funder in the identification, design, conduct, and reporting of the analysis. Describe other non-monetary sources of support.                                                                      | Page 17 - 18                     |
| Conflicts of interest | 24             | Describe any potential for conflict of interest of study contributors in accordance with journal policy. In the absence of a journal policy, we recommend authors comply with<br><br>International Committee of Medical Journal Editors recommendations. | Page 18                          |

**Table S12: Reporting checklist for cost-effectiveness analyses from the Second Panel on Cost-effectiveness in Health and Medicine<sup>50</sup>**

| Element                                                                                                                                                                                                                                                                                                                                                                      | Journal Article      | Technical Supplement  |
|------------------------------------------------------------------------------------------------------------------------------------------------------------------------------------------------------------------------------------------------------------------------------------------------------------------------------------------------------------------------------|----------------------|-----------------------|
| Introduction                                                                                                                                                                                                                                                                                                                                                                 |                      |                       |
| Background of the problem                                                                                                                                                                                                                                                                                                                                                    | Pages 4              |                       |
| Study Design and Scope                                                                                                                                                                                                                                                                                                                                                       |                      |                       |
| Objectives                                                                                                                                                                                                                                                                                                                                                                   | Page 5               |                       |
| Audience                                                                                                                                                                                                                                                                                                                                                                     |                      |                       |
| Type of analysis                                                                                                                                                                                                                                                                                                                                                             | Page 5               | Supplement Page 4     |
| Target populations                                                                                                                                                                                                                                                                                                                                                           | Page 5               | Supplement Page 4     |
| Description of interventions and comparators (including no intervention, if applicable)                                                                                                                                                                                                                                                                                      | Page 5               | Supplement Page 4     |
| Other intervention descriptors (e.g., care setting, model of delivery, intensity and timing of intervention)                                                                                                                                                                                                                                                                 | Figure 1 footnote    | Supplement Page 4     |
| Boundaries of the analysis; defining the scope or comprehensiveness of the study (e.g., for a screening program, whether only a subset of many possible strategies are included; for a transmissible condition, the extent to which disease transmission is captured; for interventions with many possible delivery settings, whether only one or more settings are modeled) | Pages 4 & 5          |                       |
| Time horizon                                                                                                                                                                                                                                                                                                                                                                 | Page 5               |                       |
| Analytic perspectives (e.g., reference case perspectives [health care sector, societal]; other perspectives such as employer or payer)                                                                                                                                                                                                                                       | Page 5               |                       |
| Whether this analysis meets the requirements of the reference case                                                                                                                                                                                                                                                                                                           | Page 8               |                       |
| Analysis plan                                                                                                                                                                                                                                                                                                                                                                |                      | Supplement Pages 4-12 |
| Methods and Data                                                                                                                                                                                                                                                                                                                                                             |                      |                       |
| Trial-based analysis or model-based analysis. If model-based:                                                                                                                                                                                                                                                                                                                |                      |                       |
| Description of event pathway or model (describe condition or disease and the health states included)                                                                                                                                                                                                                                                                         | Pages 5-7 & Figure 1 | Supplement Pages 4-9  |
| Diagram of event pathway or model (depicting the sequencing and possible transitions among the health states included)                                                                                                                                                                                                                                                       | Figure 1             | Figure S1-S2          |
| Description of model used (e.g., decision tree, state transition, microsimulation)                                                                                                                                                                                                                                                                                           | Page 5               | Supplement Page 4-9   |

| <b>Element</b>                                                                                                                                                                           | <b>Journal Article</b>  | <b>Technical Supplement</b>          |
|------------------------------------------------------------------------------------------------------------------------------------------------------------------------------------------|-------------------------|--------------------------------------|
| Modeling assumptions                                                                                                                                                                     | Pages 5-7 & Figure 1-3  | Supplement Pages 4-12 & Tables S2-S4 |
| Software used                                                                                                                                                                            |                         | Supplement Page 5                    |
| Identification of key outcomes                                                                                                                                                           | Pages 5-8               | Supplement Pages 4-10                |
| Complete information on sources of effectiveness data, cost data, and preference weights                                                                                                 | Table 1                 | Supplement Table S1                  |
| Methods for obtaining estimates of effectiveness (including approaches used for evidence synthesis)                                                                                      | Pages 5-8               | Supplement Pages 8-10 & Table S1     |
| Methods for obtaining estimates of costs and preference weights                                                                                                                          | Pages 7-8               | Supplement Pages 8-10 & Table S1     |
| Critique of data quality                                                                                                                                                                 |                         |                                      |
| Statement of costing year (i.e., the year to which all costs have been adjusted for the analysis; e.g., 2017)                                                                            | Page 7                  |                                      |
| Statement of method used to adjust costs for inflation                                                                                                                                   | Page 7                  |                                      |
| Statement of type of currency                                                                                                                                                            | Page 7                  |                                      |
| Source and methods for obtaining expert judgment if applicable                                                                                                                           |                         |                                      |
| Statement of discount rates                                                                                                                                                              | Page 7                  |                                      |
| Impact Inventory                                                                                                                                                                         |                         |                                      |
| Full accounting of consequences within and outside the health care sector                                                                                                                | Page 8                  | Supplement Pages 9-10                |
| Results                                                                                                                                                                                  |                         |                                      |
| Results of model validation                                                                                                                                                              | Page 9-10               | Figure S3-S6 & Table S6              |
| Reference case results (discounted and undiscounted): total costs and effectiveness, incremental costs and effectiveness, incremental cost-effectiveness ratios, measures of uncertainty | Pages 10 & 11 & Table 2 |                                      |
| Disaggregated results for important categories of costs, outcomes, or both                                                                                                               | Table 2                 | Tables S8                            |
| Results of sensitivity analysis                                                                                                                                                          | Page 12                 | Figure S9-S13, Tables S7-S10         |
| Other estimates of uncertainty                                                                                                                                                           | Page 12                 |                                      |
| Graphical representation of cost-effectiveness results                                                                                                                                   | Figure 3                | Figures S10                          |

| <b>Element</b>                                                                                                                               | <b>Journal Article</b> | <b>Technical Supplement</b>   |
|----------------------------------------------------------------------------------------------------------------------------------------------|------------------------|-------------------------------|
| Graphical representation of uncertainty analyses                                                                                             | Figures 2 & 3          | Figure S9, S11-S13            |
| Aggregate cost and effectiveness information                                                                                                 | Table 2                |                               |
| Secondary analyses                                                                                                                           | Figures 2 & 3, Table 2 | Figures S9-S13 & Table S7-S10 |
| Disclosures                                                                                                                                  |                        |                               |
| Statement of any potential conflicts of interest due to funding source, collaborations, or outside interests                                 | ICJME Forms            |                               |
| Discussion                                                                                                                                   |                        |                               |
| Summary of reference case results                                                                                                            | Pages 12 & 13          |                               |
| Summary of sensitivity of results to assumptions and uncertainties in the analysis                                                           | Pages 13 & 14          |                               |
| Discussion of the study results in the context of results of related cost-effective analyses                                                 | Page 13                |                               |
| Discussion of ethical implications (e.g., distributive implications relating to age, disability, or other characteristics of the population) | Pages 14-15            |                               |
| Limitations of the study                                                                                                                     | Page 15                |                               |
| Relevance of study results to specific policy questions or decisions                                                                         | Page 14                |                               |

## REFERENCES

1. SPRINT Research Group, Wright JT, Jr., Williamson JD, et al. A Randomized Trial of Intensive versus Standard Blood-Pressure Control. *N Engl J Med* 2015;373:2103-16.
2. Systolic Blood Pressure Intervention Trial (SPRINT) Protocol Version 4.0. 2012. (Accessed 10/18/2015, 2015, at [https://www.sprintrial.org/public/Protocol\\_Current.pdf](https://www.sprintrial.org/public/Protocol_Current.pdf).)
3. Ambrosius WT, Sink KM, Foy CG, et al. The design and rationale of a multicenter clinical trial comparing two strategies for control of systolic blood pressure: the Systolic Blood Pressure Intervention Trial (SPRINT). *Clin Trials* 2014;11:532-46.
4. Franklin SS, Gustin Wt, Wong ND, et al. Hemodynamic patterns of age-related changes in blood pressure. The Framingham Heart Study. *Circulation* 1997;96:308-15.
5. Law MR, Morris JK, Wald NJ. Use of blood pressure lowering drugs in the prevention of cardiovascular disease: meta-analysis of 147 randomised trials in the context of expectations from prospective epidemiological studies. *BMJ* 2009;338:b1665.
6. Iskedjian M, Einarson TR, MacKeigan LD, et al. Relationship between daily dose frequency and adherence to antihypertensive pharmacotherapy: evidence from a meta-analysis. *Clin Ther* 2002;24:302-16.
7. Jones DE, Carson KA, Bleich SN, Cooper LA. Patient trust in physicians and adoption of lifestyle behaviors to control high blood pressure. *Patient Educ Couns* 2012;89:57-62.
8. Xu KT, Ragain RM. Effects of weight status on the recommendations of and adherence to lifestyle modifications among hypertensive adults. *J Hum Hypertens* 2005;19:365-71.
9. Heidenreich PA, Davis BR, Cutler JA, et al. Cost-effectiveness of chlorthalidone, amlodipine, and lisinopril as first-step treatment for patients with hypertension: an analysis of the Antihypertensive and Lipid-Lowering Treatment to Prevent Heart Attack Trial (ALLHAT). *J Gen Intern Med* 2008;23:509-16.
10. Moran AE, Odden MC, Thanataveerat A, et al. Cost-effectiveness of hypertension therapy according to 2014 guidelines. *N Engl J Med* 2015;372:447-55.
11. Chobanian AV, Bakris GL, Black HR, et al. The Seventh Report of the Joint National Committee on Prevention, Detection, Evaluation, and Treatment of High Blood Pressure: the JNC 7 report. *JAMA* 2003;289:2560-72.
12. Physician Fee Schedule. 2016. (Accessed June 30, 2016, at <http://www.cms.gov/apps/physician-fee-schedule/overview.aspx>.)
13. Lab Fee Schedule. 2016. (Accessed June 30, 2016, at <https://www.cms.gov/Medicare/Medicare-Fee-for-Service-Payment/ClinicalLabFeeSched/clinlab.html>.)
14. Chronic disease cost calculator. Version 2. 2013. (Accessed July 7, 2016, at <http://www.cdc.gov/chronicdisease/calculator>.)
15. Trogdon JG, Murphy LB, Khavjou OA, et al. Costs of Chronic Diseases at the State Level: The Chronic Disease Cost Calculator. *Prev Chronic Dis* 2015;12:E140.
16. 2015 Annual Data Report. Volume 1: Chronic Kidney Disease in the United States. Chapter 2: Identification and Care of Patients With CKD. 2015.
17. Healthcare Cost and Utilization Project (HCUP), Statistics on Hospital Stays. 2013. (Accessed June 30, 2016, at <http://hcupnet.ahrq.gov/HCUPnet.jsp?Id=9601BB1AC7EAF0E8&Form=DispTab&GoTo=MAINSEL&JS=Y>.)

18. Fu AZ, Kattan MW. Utilities should not be multiplied: evidence from the preference-based scores in the United States. *Med Care* 2008;46:984-90.
19. King JB, Shah RU, Bress AP, Nelson RE, Bellows BK. Cost-Effectiveness of Sacubitril-Valsartan Combination Therapy Compared With Enalapril for the Treatment of Heart Failure With Reduced Ejection Fraction. *JACC Heart Fail* 2016;4:392-402.
20. Yao G, Freemantle N, Flather M, et al. Long-term cost-effectiveness analysis of nebivolol compared with standard care in elderly patients with heart failure: an individual patient-based simulation model. *Pharmacoeconomics* 2008;26:879-89.
21. Sullivan PW, Ghushchyan V. Preference-Based EQ-5D index scores for chronic conditions in the United States. *Med Decis Making* 2006;26:410-20.
22. Brooks R, Rabin R, De Charro F. The measurement and valuation of health status using EQ-5D: a European perspective: evidence from the EuroQol BIOMED Research Programme: Springer Science & Business Media; 2013.
23. Anderson JL, Heidenreich PA, Barnett PG, et al. ACC/AHA statement on cost/value methodology in clinical practice guidelines and performance measures: a report of the American College of Cardiology/American Heart Association Task Force on Performance Measures and Task Force on Practice Guidelines. *J Am Coll Cardiol* 2014;63:2304-22.
24. Neumann PJ, Cohen JT, Weinstein MC. Updating cost-effectiveness--the curious resilience of the \$50,000-per-QALY threshold. *N Engl J Med* 2014;371:796-7.
25. Weinstein MC. How much are Americans willing to pay for a quality-adjusted life year? *Med Care* 2008;46:343-5.
26. Haley WE, Gilbert ON, Riley RF, et al. The association between Self-Reported Medication Adherence scores and systolic blood pressure control: a SPRINT baseline data study. *J Am Soc Hypertens* 2016;10:857-64 e2.
27. Morisky DE, Ang A, Krousel-Wood M, Ward HJ. Predictive validity of a medication adherence measure in an outpatient setting. *J Clin Hypertens (Greenwich)* 2008;10:348-54.
28. Krousel-Wood M, Islam T, Webber LS, Re RN, Morisky DE, Muntner P. New medication adherence scale versus pharmacy fill rates in seniors with hypertension. *Am J Manag Care* 2009;15:59-66.
29. Lloyd-Jones DM, Leip EP, Larson MG, et al. Prediction of lifetime risk for cardiovascular disease by risk factor burden at 50 years of age. *Circulation* 2006;113:791-8.
30. Red BOOK Online®. 2016. (Accessed June 28, 2016, at <http://www.micromedex.com/>.)
31. Chobanian AV, Bakris GL, Black HR, et al. The seventh report of the joint national committee on prevention, detection, evaluation, and treatment of high blood pressure: the JNC 7 report. *Jama* 2003;289:2560-71.
32. Officers A, Coordinators for the ACRGTA, Lipid-Lowering Treatment to Prevent Heart Attack T. Major outcomes in high-risk hypertensive patients randomized to angiotensin-converting enzyme inhibitor or calcium channel blocker vs diuretic: The Antihypertensive and Lipid-Lowering Treatment to Prevent Heart Attack Trial (ALLHAT). *JAMA* 2002;288:2981-97.
33. Goff DC, Jr., Lloyd-Jones DM, Bennett G, et al. 2013 ACC/AHA guideline on the assessment of cardiovascular risk: a report of the American College of

Cardiology/American Heart Association Task Force on Practice Guidelines. *Circulation* 2014;129:S49-73.

34. Arias E, Heron M, Tejada-Vera B. United States life tables eliminating certain causes of death, 1999-2001. *Natl Vital Stat Rep* 2013;61:1-128.
35. Tajeu GS, Kent ST, Kronish IM, et al. Trends in Antihypertensive Medication Discontinuation and Low Adherence Among Medicare Beneficiaries Initiating Treatment From 2007 to 2012 Novelty and Significance. *Hypertension* 2016;68:565-75.
36. Claxton AJ, Cramer J, Pierce C. A systematic review of the associations between dose regimens and medication compliance. *Clin Ther* 2001;23:1296-310.
37. Will JC, Zhang Z, Ritchey MD, Loustalot F. Medication adherence and incident preventable hospitalizations for hypertension. *American journal of preventive medicine* 2016;50:489-99.
38. Bress AP, Tanner RM, Hess R, Colantonio LD, Shimbo D, Muntner P. Generalizability of SPRINT Results to the U.S. Adult Population. *Journal of the American College of Cardiology* 2016;67:463-72.
39. Liem YS, Bosch JL, Hunink MM. Preference-based quality of life of patients on renal replacement therapy: a systematic review and meta-analysis. *Value in Health* 2008;11:733-41.
40. Number and percentage of prevalent cases of hemodialysis, peritoneal dialysis, and transplantation by age, sex, race, ethnicity, and primary ESRD diagnosis, in the U.S. population. 2013. at Vol. 2 Chapter 1, Table 1.8: .)
41. Dyer MT, Goldsmith KA, Sharples LS, Buxton MJ. A review of health utilities using the EQ-5D in studies of cardiovascular disease. *Health and quality of life outcomes* 2010;8:13.
42. Hutchins R, Viera AJ, Sheridan SL, Pignone MP. Quantifying the utility of taking pills for cardiovascular prevention. *Circ Cardiovasc Qual Outcomes* 2015;8:155-63.
43. Bardage C, Isacson DG. Self-reported side-effects of antihypertensive drugs: an epidemiological study on prevalence and impact on health-state utility. *Blood Press* 2000;9:328-34.
44. Groeneveld PW, Lieu TA, Fendrick AM, et al. Quality of life measurement clarifies the cost-effectiveness of *Helicobacter pylori* eradication in peptic ulcer disease and uninvestigated dyspepsia. *The American journal of gastroenterology* 2001;96:338-47.
45. Cook NR, Ridker PM. Calibration of the Pooled Cohort Equations for Atherosclerotic Cardiovascular Disease: An Update. *Ann Intern Med* 2016;165:786-94.
46. D'Agostino RB, Russell MW, Huse DM, et al. Primary and subsequent coronary risk appraisal: new results from the Framingham study. *Am Heart J* 2000;139:272-81.
47. Richman IB, Fairley M, Jorgensen ME, Schuler A, Owens DK, Goldhaber-Fiebert JD. Cost-effectiveness of Intensive Blood Pressure Management. *JAMA Cardiol* 2016;1:872-9.
48. Peeters A, Mamun A, Willekens F, Bonneux L. A cardiovascular life history. *European heart journal* 2002;23:458-66.
49. Husereau D, Drummond M, Petrou S, et al. Consolidated Health Economic Evaluation Reporting Standards (CHEERS) statement. *Value Health* 2013;16:e1-5.

50. Sanders GD, Neumann PJ, Basu A, et al. Recommendations for Conduct, Methodological Practices, and Reporting of Cost-effectiveness Analyses: Second Panel on Cost-Effectiveness in Health and Medicine. *JAMA* 2016;316:1093-103.
